# Supplementary material for: Chemical Elements, Flavor Chemicals, and Nicotine in Unused and Used Electronic Cigarettes Aged 5–10 Years and Effects of pH
Source: MDPI journal article supplement (doi:10.3390/ijerph192416931), 2022-12-16
Supplement: s1 [file s1]

Supplemental Material for

Chemical Elements, Flavor Chemicals, and Nicotine in Unused and Used Electronic Cigarettes Aged 5-10  
Years and Effects of pH

Monique Williams<sup>1</sup>, Wentai Luo<sup>2</sup>, Kevin McWhirter<sup>2</sup>, Omeka Ikegbu<sup>1</sup>, and Prue Talbot<sup>1,\*</sup>

<sup>1</sup> Department of Molecular, Cell, and Systems Biology, University of California, Riverside, CA 92521, USA

<sup>2</sup> Department of Chemistry and Department of Civil & Environmental Engineering, Portland State University, Portland, OR 97207, USA

\* Correspondence: talbot@ucr.edu; Tel.: +1-951-850-7783

## Table of Contents

Table S1: Electronic cigarette selection and materials list.

Running conditions for inductively coupled plasma optical emission spectroscopy and gas chromatography mass spectroscopy

Table S2-4. Brand, sample types, average individual element concentrations and total concentrations (mg/L)

Table S5. Individual element concentration ranges for aged unused and used electronic cigarette fluid

Table S6. Brands which had the elements with the highest concentrations.

Table S7. Element, brand, sample type, highest concentration in alphabetical and decreasing order.

Figures S1-22. Twenty-two individual element concentrations in ten brands of unused, gently used, and heavily used first generation EC fluid.

Figure S23. Heat map showing element concentrations in heavily used EC fluids relative to the gently used ECs fluids

Table S 8. Correlation between elements detected in unused (U), gently used (G), and heavily used (H) e-liquid and elements identified in EC atomizer components.

Table S9. Flavor chemicals detected and acids in aged unused and used e-liquid that were below limit of quantification or not detected

Table S10. Concentrations of elements/metals reported in the fluid ( $\mu\text{g}/\text{mg}$ )

Table S11. Comparison of element/metal concentrations (mg/L) in cigarette butts (CB) and EC cartomizers

Table S1: Electronic cigarette selection and materials list.

| <b>EC Style</b>          | <b>Brand</b>                    | <b>Manufacturer</b>                        |
|--------------------------|---------------------------------|--------------------------------------------|
| Cartomizer               | BluCig (Tobacco and Menthol)    | Lorillard Inc., Greensboro, NC             |
|                          | Greensmoke                      | GreenSmoke LLC, Richmond, VA               |
|                          | MarkTen                         | Altria Group, Inc., Richmond, VA           |
|                          | NJOY NPRO                       | Sottera Inc., Scottsdale, AZ               |
|                          | SafeCig                         | The Safe Cig LLC, Los Angeles, CA          |
|                          | South Beach Smoke               | South Beach Java LP, Wood Dale, IL         |
|                          | V2 Cigs                         | VMR Products LLC., Miami, FL               |
|                          | Vuse                            | Reynolds American, Inc., Winston-Salem, NC |
|                          |                                 |                                            |
| Disposable               | BluCig                          | Lorillard Inc., Greensboro, NC             |
|                          | Vype                            | Reynolds American, Inc., Winston-Salem, NC |
|                          |                                 |                                            |
| Nitric Acid              | Veritas Nitric Acid Redistilled | GFS Chemical Inc, Columbus, OH             |
| Deionized water          | Milli-Q                         | EMD Millipore Sigma, Burlington, MA        |
|                          |                                 |                                            |
| Element Standards        | Aluminum                        | All elemental standards are from           |
|                          | Arsenic                         | Inorganic Ventures, Christiansburg, VA     |
|                          | Boron                           |                                            |
|                          | Cadmium                         |                                            |
|                          | Calcium                         |                                            |
|                          | Chromium                        |                                            |
|                          | Cobalt                          |                                            |
|                          | Copper                          |                                            |
|                          | Iron                            |                                            |
|                          | Lead                            |                                            |
|                          | Magnesium                       |                                            |
|                          | Manganese                       |                                            |
|                          | Nickel                          |                                            |
|                          | Potassium                       |                                            |
|                          | Selenium                        |                                            |
|                          | Silicon                         |                                            |
|                          | Silver                          |                                            |
|                          | Sodium                          |                                            |
|                          | Tin                             |                                            |
|                          | Titanium                        |                                            |
|                          | Vanadium                        |                                            |
|                          | Zinc                            |                                            |
|                          |                                 |                                            |
| Flavor chemical analysis | Isopropyl alcohol               | Fisher Scientific, Fair Lawn, NJ           |
|                          |                                 |                                            |

Running conditions for inductively coupled plasma optical emission spectroscopy and gas chromatography/mass spectroscopy

#### Inductively Coupled Plasma Optical Emission Spectroscopy (ICP-OES)

All metal analysis was performed using a Perkin–Elmer Optima 7300 DV (Perkin Elmer, USA) ICP-OES equipped with an autosampler, a nebulizer (Perkin-Elmer, N0777036 REV A, Cyclonic spray chamber Optima 5300DV, Quartz 7mm baffle drain line) and a segmented array detector charge coupled device detector (SCD) were used for all analyses. The ICP-OES was calibrated daily using four Perkin-Elmer multi-element calibration standards (Plus #2, #3, #4, and #5). NIST standard reference materials (Ultra Scientific, trace metal sample, catalogue number QCI-700A North Kingstown, RI) were used for quality control checks on the ICP calibrations. Running conditions for the ICP OES are as follows to increase stability: plasma flow = 15 L/min, auxiliary flow 0.2 L/min, nebulizer flow of 0.5 L/min, radio frequency power 1350 W, sample flow rate = 0.80 mL/min, and a read delay time of 12 sec. Yttrium at 2.5 ppm was used as an internal standard and was run in line with sample introduction into the nebulizer. 1% nitric acid and distilled deionized water were ran as a blank. When interference was observed for any element, additional peaks were monitored to identify the best wavelength for quantification.

#### Gas Chromatography Mass Spectrometry (GC-MS)

All flavor chemicals and nicotine analysis were performed using an Agilent 5975C GCMS system (Santa Clara, CA). The GC column was a Restek Rxi-624Sil MS (Bellefonte, PA, 30 m long, 0.25 mm id, and 1.4 µm film thickness). Twenty µL of 2000 ng/µL 1,2,3-trichlorobenzene as internal standard was added to each sample before GC/MS analysis. One µL of each sample was injected into the GC injector with a 10:1 split. The injector temperature was 235 °C. The GC temperature program for all analyses was: 40 °C hold for 2 min; 10 °C/min to 100 °C; then 12 °C/min to 280 °C; hold for 8 min at 280 °C; then 10 °C/min to 230 °C. The MS was operated in electron impact ionization mode at 70 eV in positive ion mode. The ion source temperature was 220 °C. The scan range was 34 to 400 amu. Each target analyte was quantitated using authentic standards and an internal standard of 1,2,3-trichlorobenzene normalized multipoint calibration. All reported concentration values were based on a 1:20 dilution, except for overloaded peaks at 1:20 dilution, in which case quantitation was based on a 1:200 dilution sample.



Table S2. Brand, sample types, average individual element concentrations and total concentrations (mg/L)

| Brand (Sample Type)                 | Sodium             | Calcium         | Silicon        | Iron           | Aluminum       | Potassium      | Total <sup>a</sup>  |
|-------------------------------------|--------------------|-----------------|----------------|----------------|----------------|----------------|---------------------|
| BluCig<br>(Unused)                  | 1.99<br>± 0.74     | 1.64<br>± 0.25  | 1.44<br>± 0.25 | 0.45<br>± 0.15 | 0.04<br>± 0.00 | N/M            | 44.86<br>± 14.77    |
| BluCig<br>(Gently Used)             | 2.47<br>± 0.09     | 0.53<br>± 0.41  | 0.81<br>± 0.03 | 0.80<br>± 0.08 | 0.03<br>± 0.01 | 0.08<br>± 0.18 | 22.89<br>± 3.61     |
| BluCig<br>(Heavily Used)            | 5.31<br>± 0.33     | 8.08<br>± 1.48  | 1.75<br>± 0.27 | 1.43<br>± 0.45 | 0.13<br>± 0.08 | 0.54<br>± 0.27 | 191.26<br>± 33.92   |
| BluCig Disposable<br>(Unused)       | 2.12<br>± 0.75     | 1.02<br>± 0.17  | 1.83<br>± 0.27 | 0.10<br>± 0.05 | 0.11<br>± 0.14 | 1.89<br>± 2.90 | 68.16<br>± 24.97    |
| BluCig Disposable<br>(Gently Used)  | 1.49<br>± 1.29     | 2.61<br>± 3.65  | 1.56<br>± 1.38 | 0.03<br>± 0.03 | 0.01<br>± 0.01 | 0.12<br>± 0.10 | 73.28<br>± 74.20    |
| BluCig Disposable<br>(Heavily Used) | 3.35<br>± 1.27     | 9.01<br>± 2.45  | 2.29<br>± 0.37 | 0.10<br>± 0.01 | 0.04<br>± 0.01 | 0.24<br>± 0.01 | 163.83<br>± 49.83   |
| Greensmoke<br>(Unused)              | 0.74<br>± 0.38     | 0.16<br>± 0.04  | 2.65<br>± 0.26 | 0.25<br>± 0.17 | 0.02<br>± 0.01 | 0.03<br>± 0.03 | 12.31<br>± 3.67     |
| Greensmoke<br>(Gently Used)         | 421.52<br>± 244.40 | 0.48<br>± 0.07  | 2.85<br>± 0.38 | 3.36<br>± 1.54 | 2.43<br>± 2.74 | 0.59<br>± 0.22 | 1478.32<br>± 468.04 |
| Greensmoke<br>(Heavily Used)        | 310.59<br>± 121.12 | 1.98<br>± 1.28  | 2.68<br>± 0.74 | 3.03<br>± 3.29 | 1.09<br>± 1.59 | 1.05<br>± 0.66 | 1292.95<br>± 130.38 |
| NJOY NPRO<br>(Unused)               | 644.05<br>± 292.65 | 2.52<br>± 0.28  | 3.28<br>± 0.43 | 2.26<br>± 0.64 | 2.92<br>± 0.57 | 0.29<br>± 0.10 | 2214.87<br>± 852.53 |
| NJOY NPRO<br>(Gently Used)          | 128.55<br>± 87.68  | 1.00<br>± 0.31  | 4.21<br>± 0.38 | 0.12<br>± 0.08 | 0.39<br>± 0.33 | 0.91<br>± 0.08 | 542.73<br>± 315.95  |
| NJOY NPRO<br>(Heavily Used)         | 102.31<br>± 115.47 | 1.10<br>± 0.49  | 4.08<br>± 0.21 | 0.17<br>± 0.20 | 0.25<br>± 0.26 | 0.91<br>± 0.43 | 441.06<br>± 412.64  |
| SafeCig<br>(Unused)                 | 344.65<br>± 130.93 | 2.16<br>± 0.25  | 0.63<br>± 0.06 | 2.29<br>± 0.99 | 1.98<br>± 0.48 | 0.95<br>± 0.14 | 1661.18<br>± 382.00 |
| SafeCig<br>(Gently Used)            | 169.14<br>± 86.67  | 2.52<br>± 0.73  | 4.06<br>± 0.07 | 0.35<br>± 0.37 | 0.48<br>± 0.32 | 0.51<br>± 0.14 | 772.74<br>± 390.48  |
| MarkTen<br>(Gently Used)            | 252.05<br>± 123.29 | 5.59<br>± 3.43  | 1.45<br>± 0.47 | 0.05<br>± 0.05 | N/D            | N/D            | 916.17<br>± 446.43  |
| MarkTen<br>(Heavily Used)           | 171.04<br>± 36.72  | 4.71<br>± 2.15  | 1.29<br>± 0.35 | 0.12<br>± 0.02 | N/D            | N/D            | 671.35<br>± 193.35  |
| Vuse<br>(Gently Used)               | N/D                | 1.42<br>± 0.14  | 1.53<br>± 0.13 | 1.01<br>± 0.26 | N/D            | N/D            | 5.65<br>± 0.52      |
| Vuse<br>(Heavily Used)              | 0.03<br>± 0.05     | 2.00<br>± 0.45  | 1.34<br>± 0.19 | 0.94<br>± 0.44 | 0.05<br>± 0.06 | N/D            | 6.91<br>± 0.46      |
| South Beach Smoke<br>(Unused)       | 0.99<br>± 0.15     | 0.81<br>± 0.86  | 4.00<br>± 0.31 | 0.09<br>± 0.03 | 0.01<br>± 0.01 | 0.02<br>± 0.01 | 10.07<br>± 2.44     |
| South Beach Smoke<br>(Gently Used)  | 1.44<br>± 0.21     | 2.54<br>± 0.87  | 4.12<br>± 0.38 | 0.07<br>± 0.01 | 0.02<br>± 0.01 | 0.16<br>± 0.06 | 14.23<br>± 4.43     |
| South Beach Smoke<br>(Heavily Used) | 1.67<br>± 0.16     | 18.42<br>± 4.32 | 4.23<br>± 0.31 | 0.08<br>± 0.01 | 0.02<br>± 0.01 | 0.10<br>± 0.08 | 35.80<br>± 14.85    |
| V2 Cig<br>(Unused)                  | 1.37<br>± 0.08     | 0.22<br>± 0.06  | 9.30<br>± 4.68 | 0.03<br>± 0.00 | 0.01<br>± 0.01 | 0.09<br>± 0.02 | 11.96<br>± 4.77     |
| V2 Cig<br>(Gently Used)             | 1.78<br>± 0.27     | 0.32<br>± 0.09  | 6.98<br>± 0.24 | 0.03<br>± 0.01 | 0.01<br>± 0.01 | 0.24<br>± 0.05 | 12.83<br>± 2.84     |
| V2 Cig<br>(Heavily Used)            | 2.40<br>± 0.67     | 18.45<br>± 4.81 | 8.73<br>± 0.71 | 0.08<br>± 0.03 | 0.01<br>± 0.00 | 0.22<br>± 0.15 | 32.66<br>± 5.81     |
| Vype<br>(Unused)                    | 4.51<br>± 0.29     | 5.11<br>± 0.09  | 2.56<br>± 0.16 | 0.02<br>± 0.00 | 0.03<br>± 0.00 | 0.19<br>± 0.01 | 117.53<br>± 5.79    |
| Vype<br>(Gently Used)               | 5.17<br>± 0.13     | 4.94<br>± 3.29  | 1.65<br>± 0.65 | 0.03<br>± 0.00 | 0.05<br>± 0.01 | 0.24<br>± 0.02 | 151.47<br>± 0.13    |

<sup>a</sup>Total concentration of all 22 elements measured in the fluid. Abbreviations: N/D; Not Detected, N/M; Not Measured

Table S3. Brand, sample types, average individual element concentrations and total concentrations (mg/L)

| Brand (Sample Type)                 | Boron          | Magnesium      | Manganese       | Selenium       | Chromium       | Silver         |
|-------------------------------------|----------------|----------------|-----------------|----------------|----------------|----------------|
| BluCig<br>(Unused)                  | 0.25<br>± 0.08 | 0.77<br>± 0.02 | 0.03<br>± 0.01  | N/D            | 0.02<br>± 0.02 | 0.01<br>± 0.00 |
| BluCig<br>(Gently Used)             | 0.11<br>± 0.02 | 0.72<br>± 0.19 | 0.07<br>± 0.02  | N/D            | 0.01<br>± 0.01 | 0.01<br>± 0.00 |
| BluCig<br>(Heavily Used)            | 0.25<br>± 0.06 | 0.87<br>± 0.16 | 0.10<br>± 0.01  | N/D            | 0.19<br>± 0.09 | 0.02<br>± 0.01 |
| BluCig Disposable<br>(Unused)       | 0.13<br>± 0.02 | 0.43<br>± 0.38 | 0.011<br>± 0.01 | 0.18<br>± 0.02 | N/D            | 0.01<br>± 0.00 |
| BluCig Disposable<br>(Gently Used)  | 0.08<br>± 0.07 | 0.20<br>± 0.18 | 0.01<br>± 0.02  | 0.12<br>± 0.12 | N/D            | 0.01<br>± 0.00 |
| BluCig Disposable<br>(Heavily Used) | 0.22<br>± 0.09 | 0.48<br>± 0.14 | 0.05<br>± 0.01  | 0.15<br>± 0.05 | 0.01<br>± 0.01 | 0.01<br>± 0.00 |
| Greensmoke<br>(Unused)              | 0.12<br>± 0.02 | 0.08<br>± 0.01 | 0.02<br>± 0.02  | N/D            | 0.01<br>± 0.01 | N/D            |
| Greensmoke<br>(Gently Used)         | 0.57<br>± 0.04 | 0.11<br>± 0.01 | 0.48<br>± 0.36  | N/D            | 0.03<br>± 0.01 | 0.05<br>± 0.01 |
| Greensmoke<br>(Heavily Used)        | 0.89<br>± 0.43 | 0.34<br>± 0.20 | 0.36<br>± 0.37  | N/D            | 0.16<br>± 0.15 | 0.06<br>± 0.03 |
| NJOY NPRO<br>(Unused)               | 0.20<br>± 0.00 | 0.40<br>± 0.06 | 0.10<br>± 0.03  | 0.01<br>± 0.01 | 0.04<br>± 0.03 | 0.12<br>± 0.03 |
| NJOY NPRO<br>(Gently Used)          | 0.10<br>± 0.01 | 0.11<br>± 0.04 | 0.14<br>± 0.11  | 0.04<br>± 0.01 | 0.05<br>± 0.05 | 0.03<br>± 0.02 |
| NJOY NPRO<br>(Heavily Used)         | 0.12<br>± 0.01 | 0.13<br>± 0.04 | 0.16<br>± 0.17  | 0.05<br>± 0.01 | 0.11<br>± 0.11 | 0.03<br>± 0.02 |
| SafeCig<br>(Unused)                 | 0.18<br>± 0.03 | 0.22<br>± 0.01 | 0.47<br>± 0.20  | 0.06<br>± 0.01 | 0.04<br>± 0.01 | 0.10<br>± 0.01 |
| SafeCig<br>(Gently Used)            | 0.17<br>± 0.06 | 0.33<br>± 0.11 | 0.39<br>± 0.23  | 0.07<br>± 0.01 | 0.02<br>± 0.01 | 0.04<br>± 0.02 |
| MarkTen<br>(Gently Used)            | 0.40<br>± 0.14 | 0.57<br>± 0.21 | 0.02<br>± 0.01  | N/D            | N/D            | N/D            |
| MarkTen<br>(Heavily Used)           | 0.41<br>± 0.00 | 0.52<br>± 0.04 | 0.03<br>± 0.00  | N/D            | N/D            | N/D            |
| Vuse<br>(Gently Used)               | 0.13<br>± 0.03 | 0.41<br>± 0.03 | 0.02<br>± 0.00  | N/D            | 0.06<br>± 0.05 | N/D            |
| Vuse<br>(Heavily Used)              | 0.22<br>± 0.10 | 0.55<br>± 0.10 | 0.02<br>± 0.01  | N/D            | 0.04<br>± 0.01 | N/D            |
| South Beach Smoke<br>(Unused)       | 0.09<br>± 0.02 | 0.09<br>± 0.00 | 0.08<br>± 0.08  | 0.08<br>± 0.01 | 0.01<br>± 0.00 | N/M            |
| South Beach Smoke<br>(Gently Used)  | 0.07<br>± 0.02 | 0.12<br>± 0.02 | 0.02<br>± 0.00  | 0.08<br>± 0.00 | N/D            | N/M            |
| South Beach Smoke<br>(Heavily Used) | 0.08<br>± 0.01 | 0.18<br>± 0.03 | 0.02<br>± 0.01  | 0.08<br>± 0.00 | 0.01<br>± 0.00 | N/M            |
| V2 Cig<br>(Unused)                  | 0.10<br>± 0.03 | 0.10<br>± 0.00 | 0.02<br>± 0.01  | 0.08<br>± 0.01 | N/D            | N/M            |
| V2 Cig<br>(Gently Used)             | 0.10<br>± 0.01 | 0.13<br>± 0.02 | 0.01<br>± 0.01  | 0.08<br>± 0.00 | 0.01<br>± 0.00 | N/M            |
| V2 Cig<br>(Heavily Used)            | 0.16<br>± 0.03 | 0.57<br>± 0.15 | 0.14<br>± 0.21  | 0.09<br>± 0.02 | 0.01<br>± 0.01 | N/M            |
| Vype<br>(Unused)                    | 0.30<br>± 0.03 | 0.19<br>± 0.01 | N/D             | 0.30<br>± 0.03 | N/D            | 0.01<br>± 0.00 |
| Vype<br>(Gently Used)               | 0.54<br>± 0.22 | 0.18<br>± 0.10 | N/D             | 0.37<br>± 0.01 | N/D            | 0.01<br>± 0.00 |

Abbreviations: N/D; Not Detected, N/M; Not Measured

Table S4. Brand, sample types, average individual element concentrations and total concentrations (mg/L)

| Brand (Sample Type)                 | Cobalt         | Titanium       | Cadmium        | Arsenic | Vanadium |
|-------------------------------------|----------------|----------------|----------------|---------|----------|
| BluCig<br>(Unused)                  | N/D            | 0.03<br>± 0.04 | N/D            | N/D     | N/D      |
| BluCig<br>(Gently Used)             | N/D            | N/D            | N/D            | N/D     | N/D      |
| BluCig<br>(Heavily Used)            | N/D            | 0.03<br>± 0.03 | N/D            | N/D     | N/D      |
| BluCig Disposable<br>(Unused)       | N/D            | 0.00<br>± 0.01 | N/D            | N/M     | N/D      |
| BluCig Disposable<br>(Gently Used)  | N/D            | 0.01<br>± 0.01 | N/D            | N/M     | N/D      |
| BluCig Disposable<br>(Heavily Used) | N/D            | 0.02<br>± 0.01 | N/D            | N/M     | N/D      |
| Greensmoke<br>(Unused)              | N/D            | N/D            | N/D            | N/D     | N/D      |
| Greensmoke<br>(Gently Used)         | 0.02<br>± 0.02 | N/D            | 0.06<br>± 0.01 | N/D     | N/D      |
| Greensmoke<br>(Heavily Used)        | 0.04<br>± 0.04 | 0.01<br>± 0.00 | 0.03<br>± 0.03 | N/D     | N/D      |
| NJOY NPRO<br>(Unused)               | 0.02<br>± 0.01 | 0.05<br>± 0.01 | 0.03<br>± 0.02 | N/D     | N/D      |
| NJOY NPRO<br>(Gently Used)          | 0.01<br>± 0.01 | N/D            | 0.02<br>± 0.01 | N/D     | N/D      |
| NJOY NPRO<br>(Heavily Used)         | 0.01<br>± 0.01 | N/D            | 0.01<br>± 0.01 | N/D     | N/D      |
| SafeCig<br>(Unused)                 | 0.04<br>± 0.02 | N/D            | 0.06<br>± 0.01 | N/D     | N/D      |
| SafeCig<br>(Gently Used)            | 0.06<br>± 0.04 | N/D            | N/D            | N/D     | N/D      |
| MarkTen<br>(Gently Used)            | N/D            | N/D            | N/D            | N/D     | N/D      |
| MarkTen<br>(Heavily Used)           | N/D            | N/D            | N/D            | N/D     | N/D      |
| Vuse<br>(Gently Used)               | N/D            | N/D            | N/D            | N/D     | N/D      |
| Vuse<br>(Heavily Used)              | N/D            | N/D            | N/D            | N/D     | N/D      |
| South Beach Smoke<br>(Unused)       | N/D            | N/D            | N/D            | N/D     | N/D      |
| South Beach Smoke<br>(Gently Used)  | N/D            | N/D            | N/D            | N/D     | N/D      |
| South Beach Smoke<br>(Heavily Used) | N/D            | N/D            | N/D            | N/D     | N/D      |
| V2 Cig<br>(Unused)                  | N/D            | N/D            | N/D            | N/D     | N/D      |
| V2 Cig<br>(Gently Used)             | N/D            | N/D            | N/D            | N/D     | N/D      |
| V2 Cig<br>(Heavily Used)            | N/D            | N/D            | N/D            | N/D     | N/D      |
| Vype<br>(Unused)                    | N/D            | 0.01<br>± 0.00 | N/D            | N/M     | N/D      |
| Vype<br>(Gently Used)               | N/D            | 0.01<br>± 0.01 | N/D            | N/M     | N/D      |

Abbreviations: N/D; Not Detected, N/M; Not Measured

Table S5. Individual element concentration ranges for aged unused and used electronic cigarette fluid

| Element   | Overall Range (mg/L) | Unused Range (mg/L) | Gently Used Range (mg/L) | Heavily Used Range (mg/L) |
|-----------|----------------------|---------------------|--------------------------|---------------------------|
| Aluminum  | 0.008-5.466          | 0.013-4.831         | 0.011-5.466              | 0.008-2.924               |
| Arsenic   | 0.009                | 0.009               | ND                       | ND                        |
| Boron     | 0.059-1.266          | 0.071-0.338         | 0.059-0.694              | 0.068-1.266               |
| Cadmium   | 0.001-0.078          | 0.008-0.078         | 0.001-0.073              | 0.004-0.063               |
| Calcium   | 0.112-23.529         | 0.112-5.199         | 0.215-9.512              | 0.632-23.529              |
| Chromium  | 0.003-0.323          | 0.003-0.075         | 0.003-0.117              | 0.004-0.323               |
| Cobalt    | 0.003-0.106          | 0.014-0.065         | 0.003-0.106              | 0.005-0.070               |
| Copper    | 0.050-1749.64        | 0.172-1749.64       | 0.050-572.35             | 0.077-608.20              |
| Iron      | 0.022-6.82           | 0.022-5.728         | 0.024-4.405              | 0.031-6.821               |
| Lead      | 0.011-93.38          | 0.011-93.38         | 0.012-72.33              | 0.036-72.90               |
| Magnesium | 0.067-1.051          | 0.067-0.874         | 0.085-0.934              | 0.097-1.05                |
| Manganese | 0.002-0.790          | 0.002-0.701         | 0.003-0.779              | 0.010-0.790               |
| Nickel    | 0.001-102.49         | 0.001-78.289        | 0.002-54.307             | 0.002-102.49              |
| Potassium | 0.007-5.229          | 0.007-5.229         | 0.115-0.981              | 0.053-1.467               |
| Selenium  | 0.015-0.372          | 0.015-0.328         | 0.039-0.372              | 0.048-0.199               |
| Silicon   | 0.450-12.64          | 0.450-12.647        | 0.783-7.22               | 1.058-9.478               |
| Silver    | 0.003-0.154          | 0.003-0.154         | 0.004-0.059              | 0.005-0.082               |
| Sodium    | 0.091-979.46         | 0.466-979.46        | 1.214-692.17             | 0.091-412.44              |
| Tin       | 0.033-420.41         | 0.036-200.92        | 0.036-420.41             | 0.033-248.38              |
| Titanium  | 0.001-0.090          | 0.001-0.090         | 0.001-0.021              | 0.002-0.060               |
| Vanadium  | 0.003-0.005          | 0.005               | ND                       | 0.003                     |
| Zinc      | 0.282-528.67         | 0.282-528.67        | 0.317-435.48             | 0.612-334.79              |

Table S6. Brands which had the elements with the highest concentrations

| Brand      | Elements with the Highest Concentrations |
|------------|------------------------------------------|
| Greensmoke | Al, B, Cr, Fe, Mn, Ni, Sn                |
| NJOY NPRO  | Cu, Pb, Ag, Na, Zn                       |
| BluCig     | Mg, Ti                                   |
| BluCig D   | K, V                                     |
| SafeCig    | Cd, Co                                   |
| V2 Cigs    | Ca, Si                                   |
| Vype       | As, Se                                   |

Table S7. Element, brand, sample type, highest concentration in decreasing order.

| Element   | Brand      | Sample Type      | Highest Conc (mg/L) |
|-----------|------------|------------------|---------------------|
| Copper    | NJOY NPRO  | Unused - 3       | 1749.64             |
| Sodium    | NJOY NPRO  | Unused - 3       | 979.46              |
| Zinc      | NJOY NPRO  | Unused - 2       | 528.67              |
| Tin       | Greensmoke | Gently Used - 1  | 420.41              |
| Nickel    | Greensmoke | Heavily Used - 1 | 102.49              |
| Lead      | NJOY NPRO  | Unused - 3       | 93.38               |
| Calcium   | V2 Cigs    | Heavily Used - 1 | 23.529              |
| Silicon   | V2 Cigs    | Unused - 3       | 12.64               |
| Iron      | Greensmoke | Heavily Used - 1 | 6.82                |
| Aluminum  | Greensmoke | Gently Used - 3  | 5.466               |
| Potassium | BluCig D   | Unused - 3       | 5.229               |
| Boron     | Greensmoke | Heavily Used - 2 | 1.266               |
| Magnesium | BluCig     | Overtime - 1     | 1.051               |
| Manganese | Greensmoke | Heavily Used - 1 | 0.79                |
| Selenium  | Vype       | Gently Used - 2  | 0.372               |
| Chromium  | Greensmoke | Heavily Used - 1 | 0.323               |
| Silver    | NJOY NPRO  | Unused - 3       | 0.154               |
| Cobalt    | SafeCig    | Gently Used - 2  | 0.106               |
| Titanium  | BluCig     | Unused - 2       | 0.09                |
| Cadmium   | SafeCig    | Unused - 2       | 0.078               |
| Arsenic   | Vype       | Unused - 1       | 0.009               |
| Vanadium  | BluCig D   | Unused - 2       | 0.005               |

red = elements with highest concentrations, orange = divalent elements, yellow = most toxic, blue = similar in concentration, green = elements with lowest concentrations, grey = infrequently found

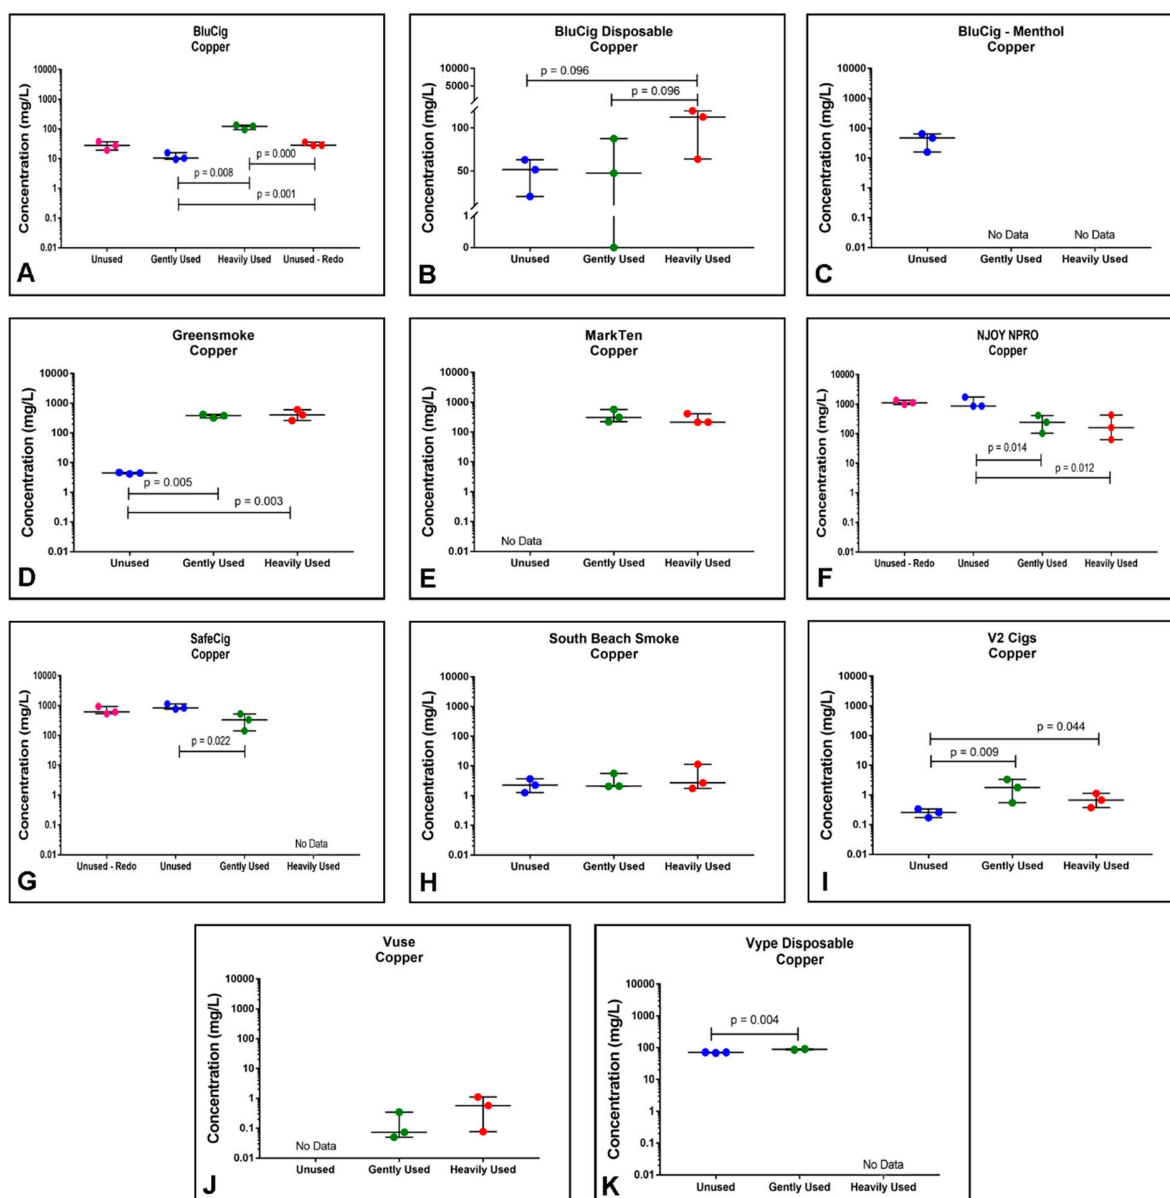

**Figure S1. Copper concentrations in ten brands of unused, gently used, and heavily used first generation EC fluid.** (A) BluCig, (B) BluCig Disposable, (C) BluCig – Menthol, (D) Greensmoke, (E) MarkTen, (F) NJOY NPRO, (G) SafeCig, (H) South Beach Smoke, (I) V2 Cigs, (J) Vuse, and (K) Vype Disposable. All fluids were analyzed in triplicates. Blue = unused, green = gently used, red = heavily used, pink = retesting of unused fluid.

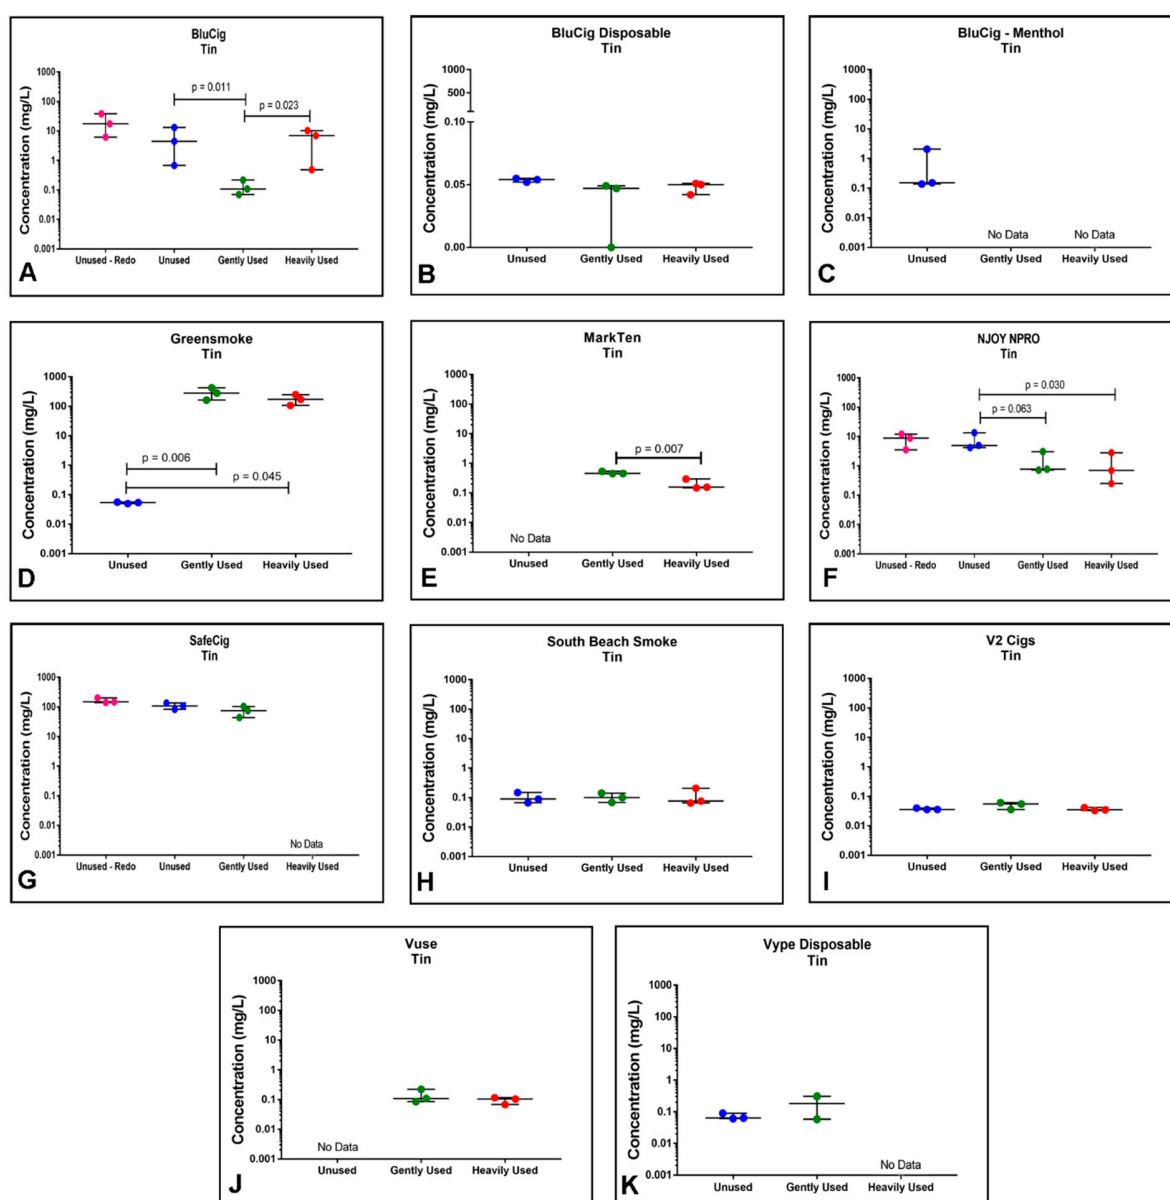

**Figure S2. Tin concentrations in ten brands of unused, gently used, and heavily used first generation EC fluid.** (A) BluCig, (B) BluCig Disposable, (C) BluCig – Menthol, (D) Greensmoke, (E) MarkTen, (F) NJOY NPRO, (G) SafeCig, (H) South Beach Smoke, (I) V2 Cigs, (J) Vuse, and (K) Vype Disposable. All fluids were analyzed in triplicates. Blue = unused, green = gently used, red = heavily used, pink = retesting of unused fluid.

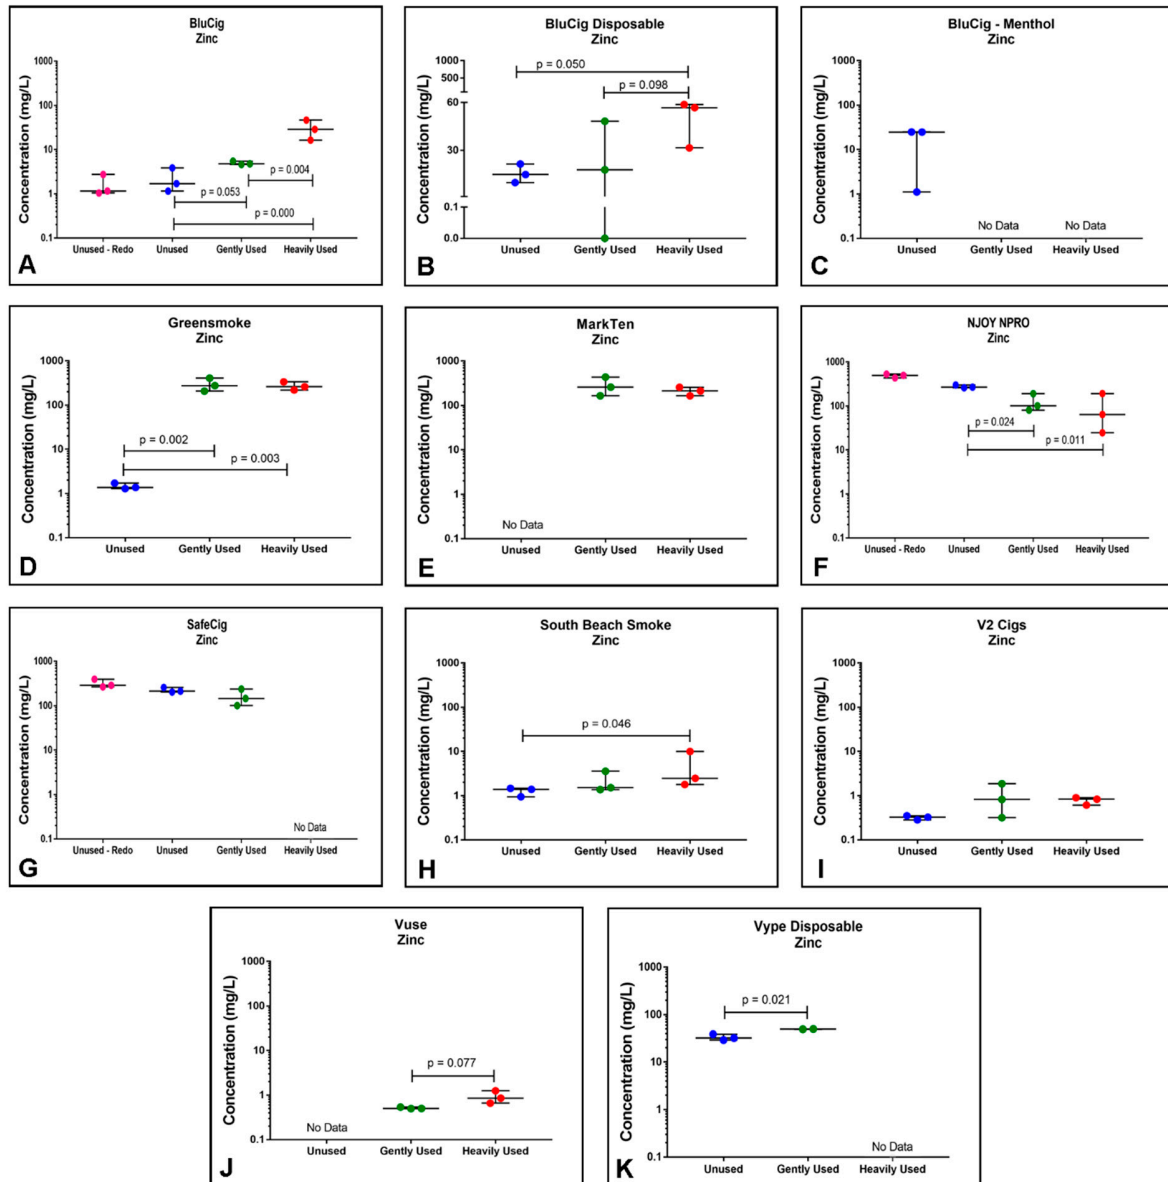

**Figure S3. Zinc concentrations in ten brands of unused, gently used, and heavily used first generation EC fluid.** (A) BluCig, (B) BluCig Disposable, (C) BluCig – Menthol, (D) Greensmoke, (E) MarkTen, (F) NJOY NPRO, (G) SafeCig, (H) South Beach Smoke, (I) V2 Cigs, (J) Vuse, and (K) Vype Disposable. All fluids were analyzed in triplicates. Blue = unused, green = gently used, red = heavily used, pink = retesting of unused fluid.



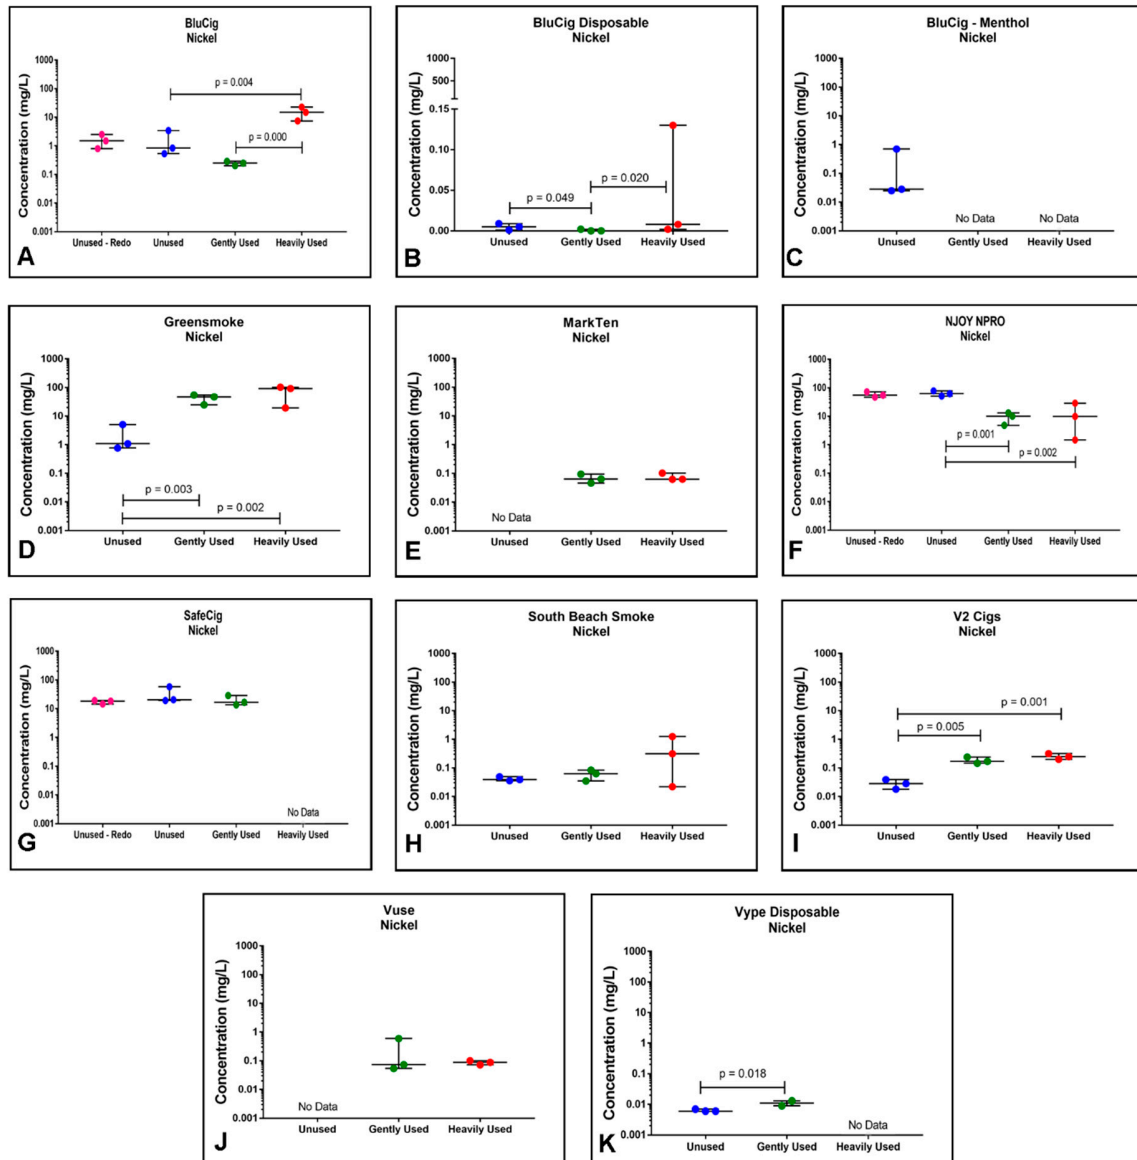

**Figure S4. Nickel concentrations in ten brands of unused, gently used, and heavily used first generation EC fluid.** (A) BluCig, (B) BluCig Disposable, (C) BluCig – Menthol, (D) Greensmoke, (E) MarkTen, (F) NJOY NPRO, (G) SafeCig, (H) South Beach Smoke, (I) V2 Cigs, (J) Vuse, and (K) Vype Disposable. All fluids were analyzed in triplicates. Blue = unused, green = gently used, red = heavily used, pink = retesting of unused fluid.

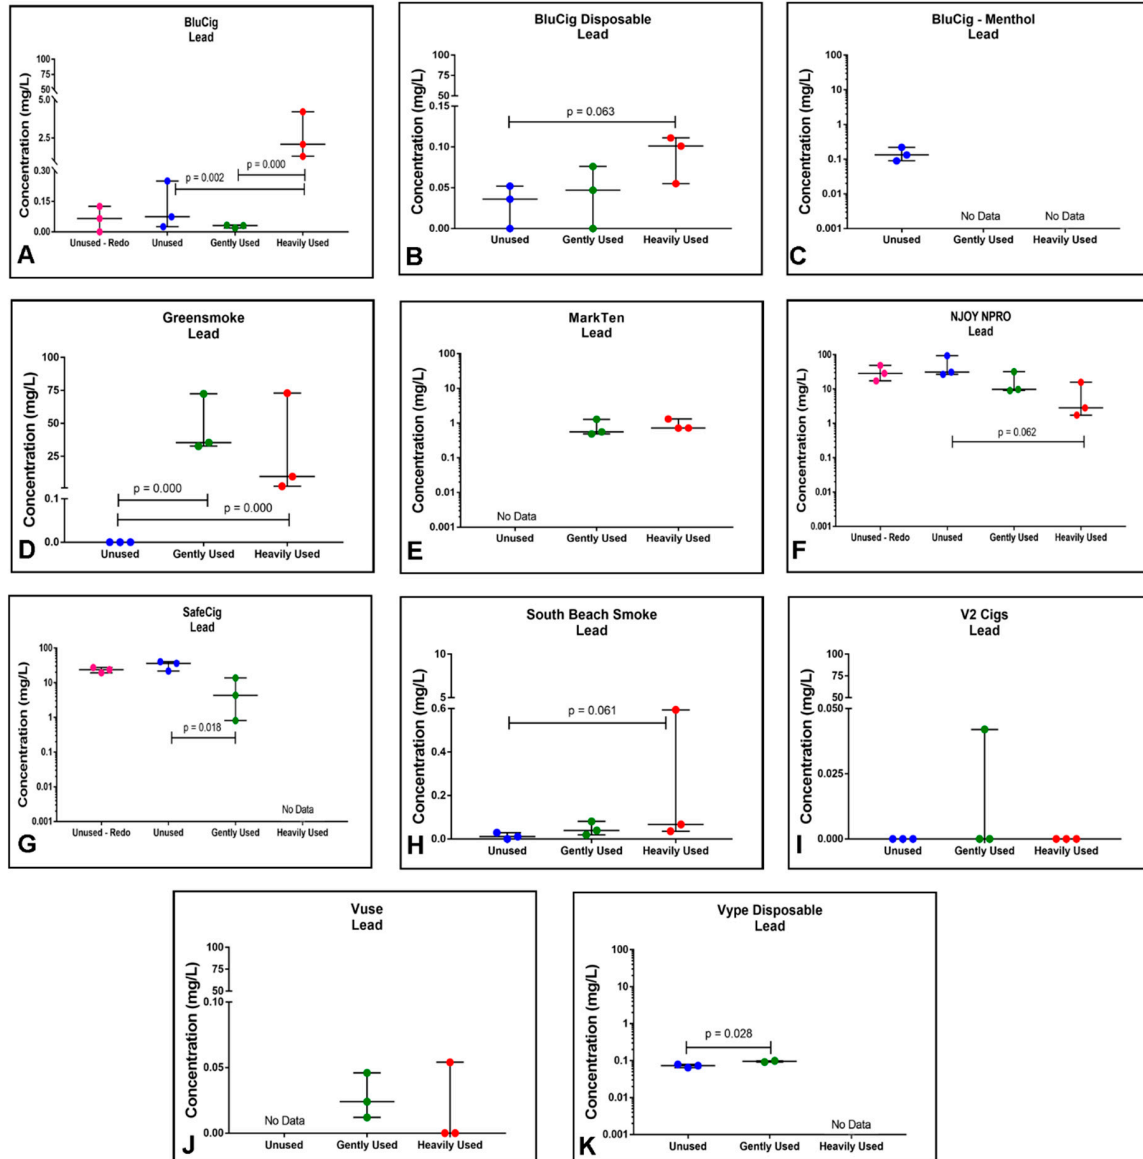

**Figure S5. Lead concentrations in ten brands of unused, gently used, and heavily used first generation EC fluid.** (A) BluCig, (B) BluCig Disposable, (C) BluCig – Menthol, (D) Greensmoke, (E) MarkTen, (F) NJOY NPRO, (G) SafeCig, (H) South Beach Smoke, (I) V2 Cigs, (J) Vuse, and (K) Vype Disposable. All fluids were analyzed in triplicates. Blue = unused, green = gently used, red = heavily used, pink = retesting of unused fluid.

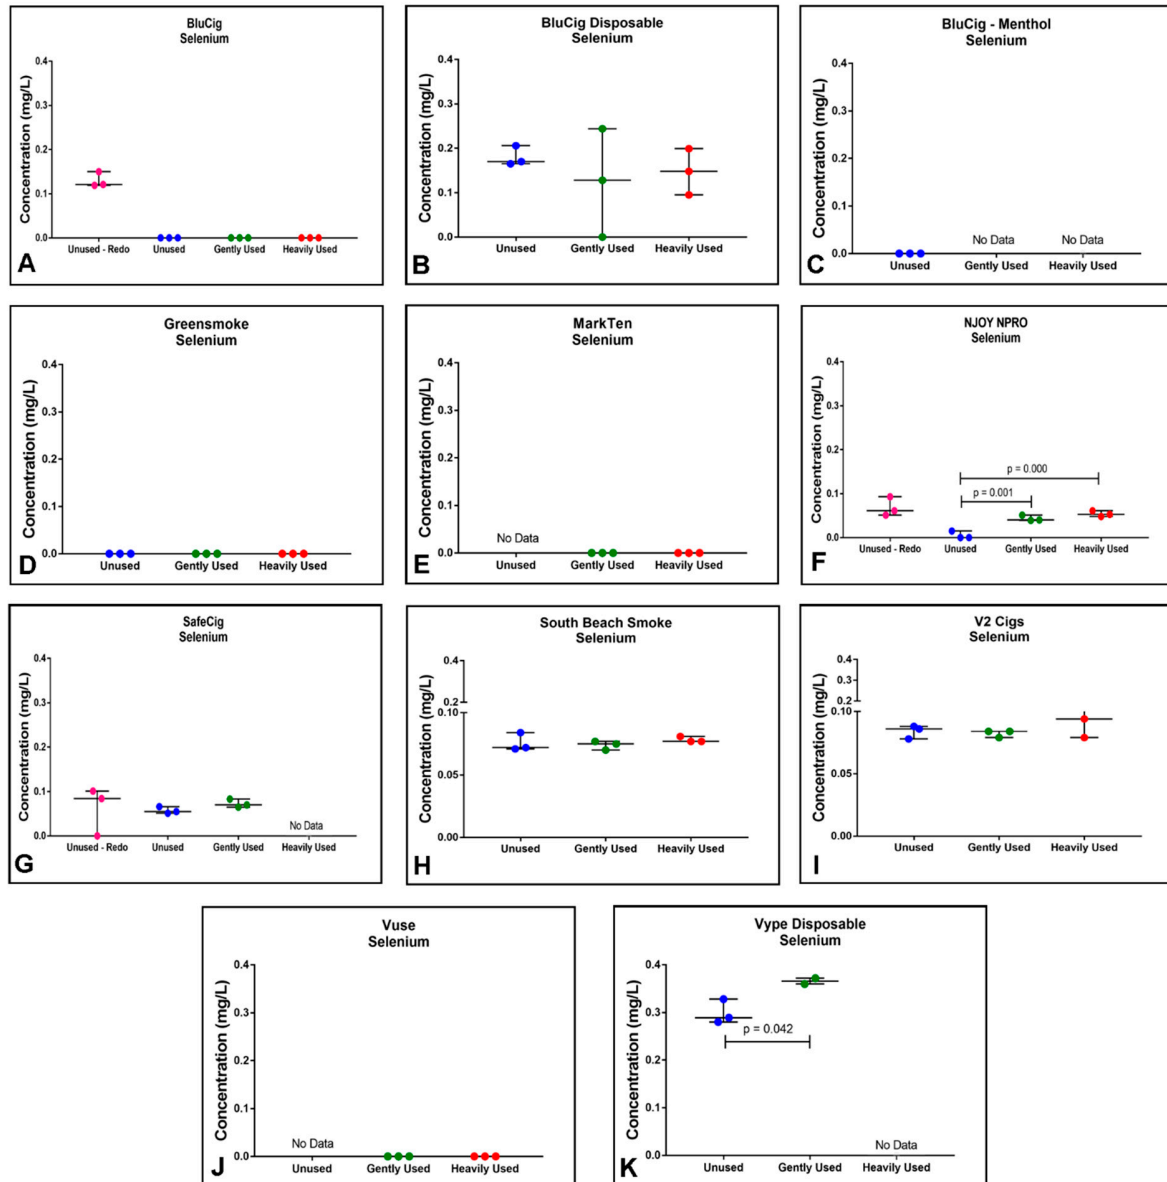

**Figure S6. Selenum concentrations in ten brands of unused, gently used, and heavily used first generation EC fluid.** (A) BluCig, (B) BluCig Disposable, (C) BluCig – Menthol, (D) Greensmoke, (E) MarkTen, (F) NJOY NPRO, (G) SafeCig, (H) South Beach Smoke, (I) V2 Cigs, (J) Vuse, and (K) Vype Disposable. All fluids were analyzed in triplicates. Blue = unused, green = gently used, red = heavily used, pink = retesting of unused fluid.

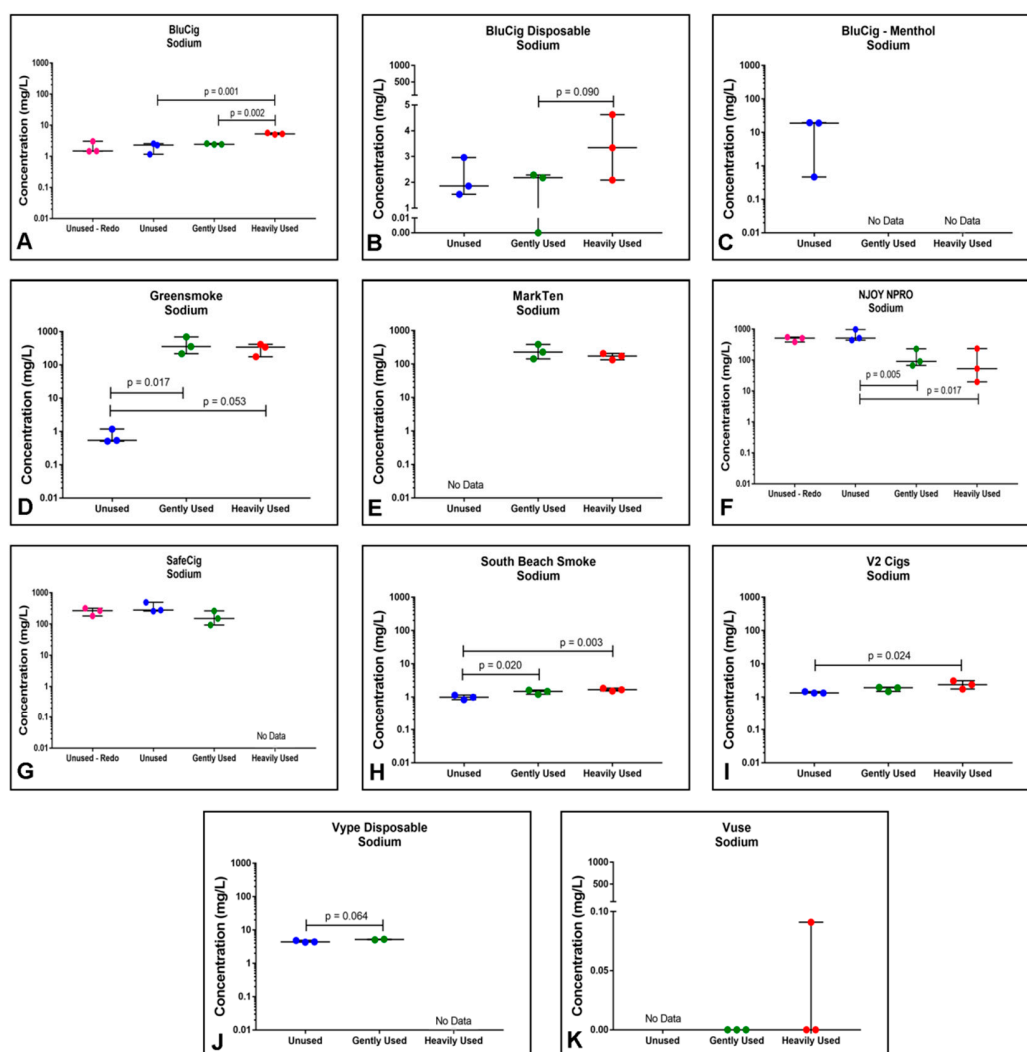

**Figure S7. Sodium concentrations in ten brands of unused, gently used, and heavily used first generation EC fluid.** (A) BluCig, (B) BluCig Disposable, (C) BluCig – Menthol, (D) Greensmoke, (E) MarkTen, (F) NJOY NPRO, (G) SafeCig, (H) South Beach Smoke, (I) V2 Cigs, (J) Vuse, and (K) Vype Disposable. All fluids were analyzed in triplicates. Blue = unused, green = gently used, red = heavily used, pink = retesting of unused fluid.

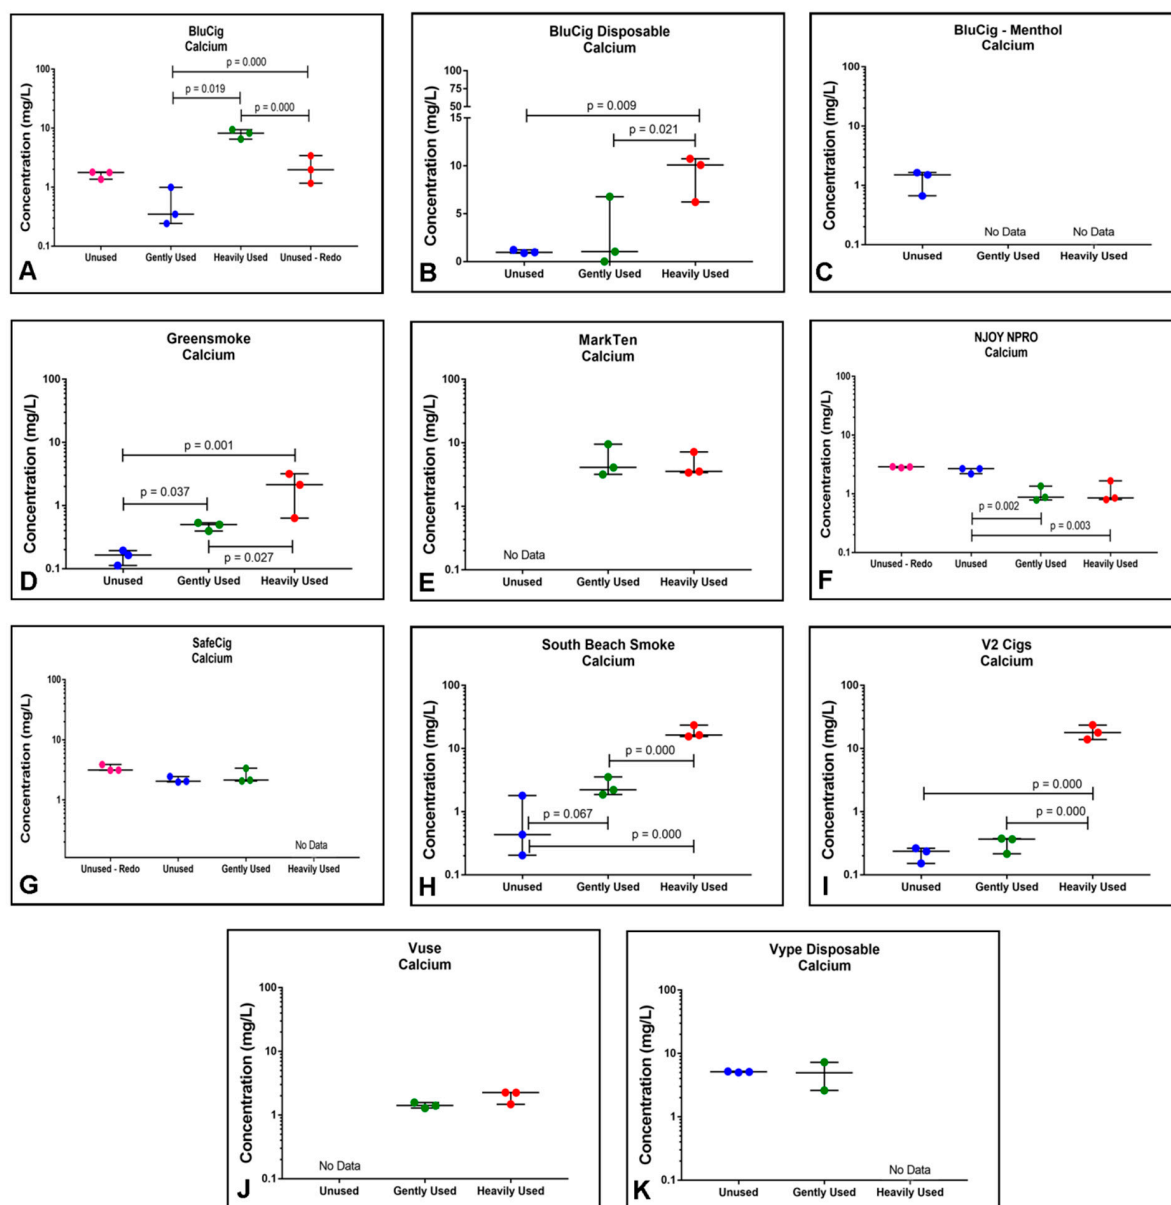

**Figure S8. Calcium concentrations in ten brands of unused, gently used, and heavily used first generation EC fluid.** (A) BluCig, (B) BluCig Disposable, (C) BluCig – Menthol, (D) Greensmoke, (E) MarkTen, (F) NJOY NPRO, (G) SafeCig, (H) South Beach Smoke, (I) V2 Cigs, (J) Vuse, and (K) Vype Disposable. All fluids were analyzed in triplicates. Blue = unused, green = gently used, red = heavily used, pink = retesting of unused fluid.

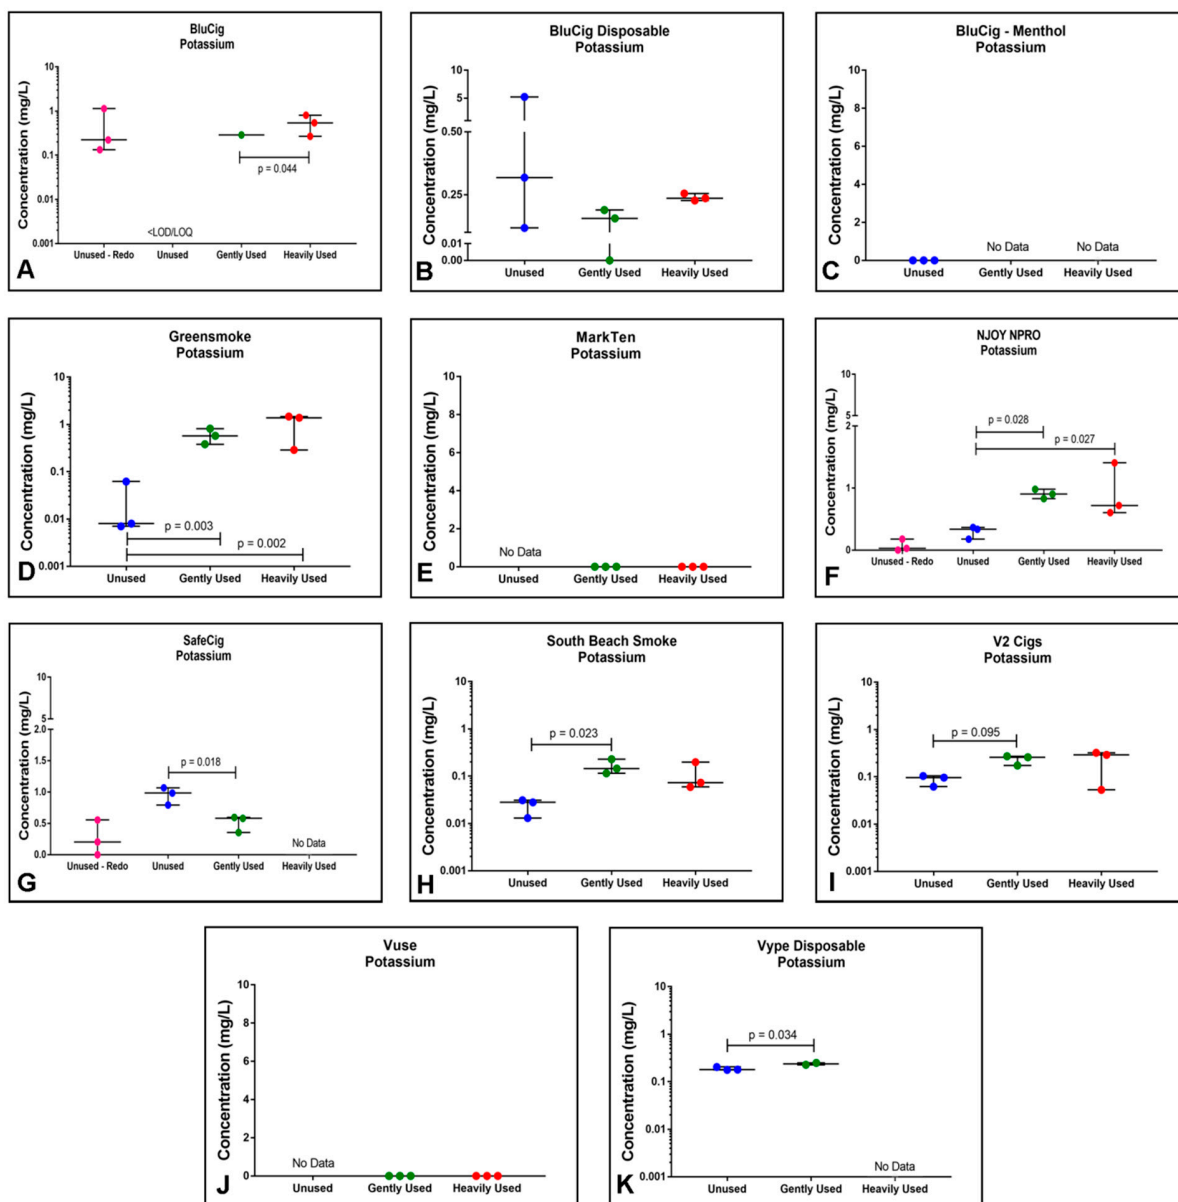

**Figure S9. Potassium concentrations in ten brands of unused, gently used, and heavily used first generation EC fluid.** (A) BluCig, (B) BluCig Disposable, (C) BluCig – Menthol, (D) Greensmoke, (E) MarkTen, (F) NJOY NPRO, (G) SafeCig, (H) South Beach Smoke, (I) V2 Cigs, (J) Vuse, and (K) Vype Disposable. All fluids were analyzed in triplicates. Blue = unused, green = gently used, red = heavily used, pink = retesting of unused fluid.

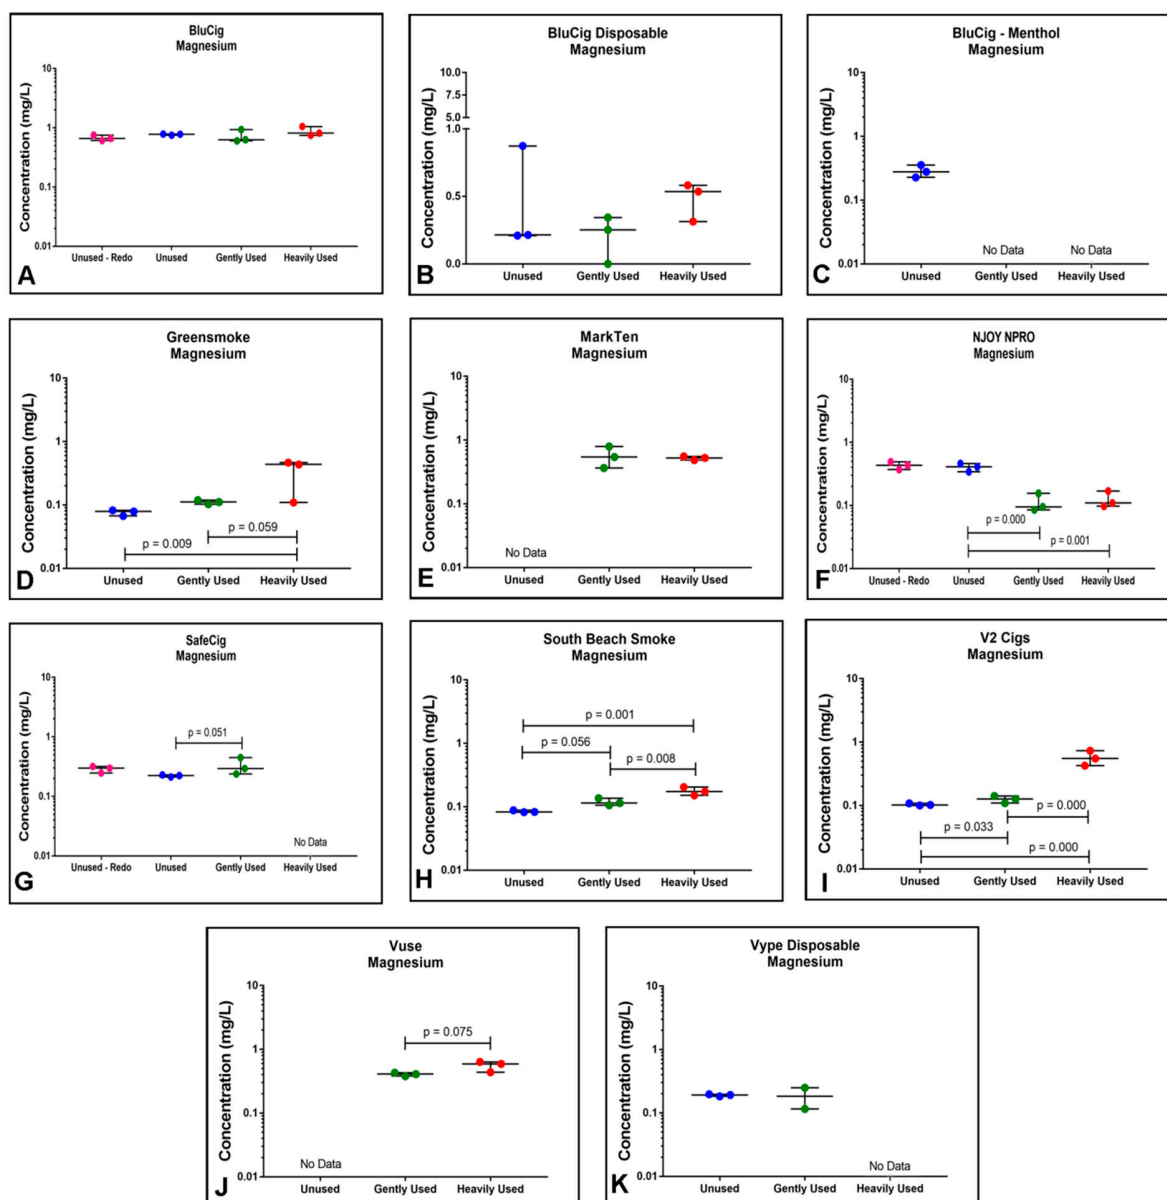

**Figure S10. Magnesium concentrations in ten brands of unused, gently used, and heavily used first generation EC fluid.** (A) BluCig, (B) BluCig Disposable, (C) BluCig – Menthol, (D) Greensmoke, (E) MarkTen, (F) NJOY NPRO, (G) SafeCig, (H) South Beach Smoke, (I) V2 Cigs, (J) Vuse, and (K) Vype Disposable. All fluids were analyzed in triplicates. Blue = unused, green = gently used, red = heavily used, pink = retesting of unused fluid.

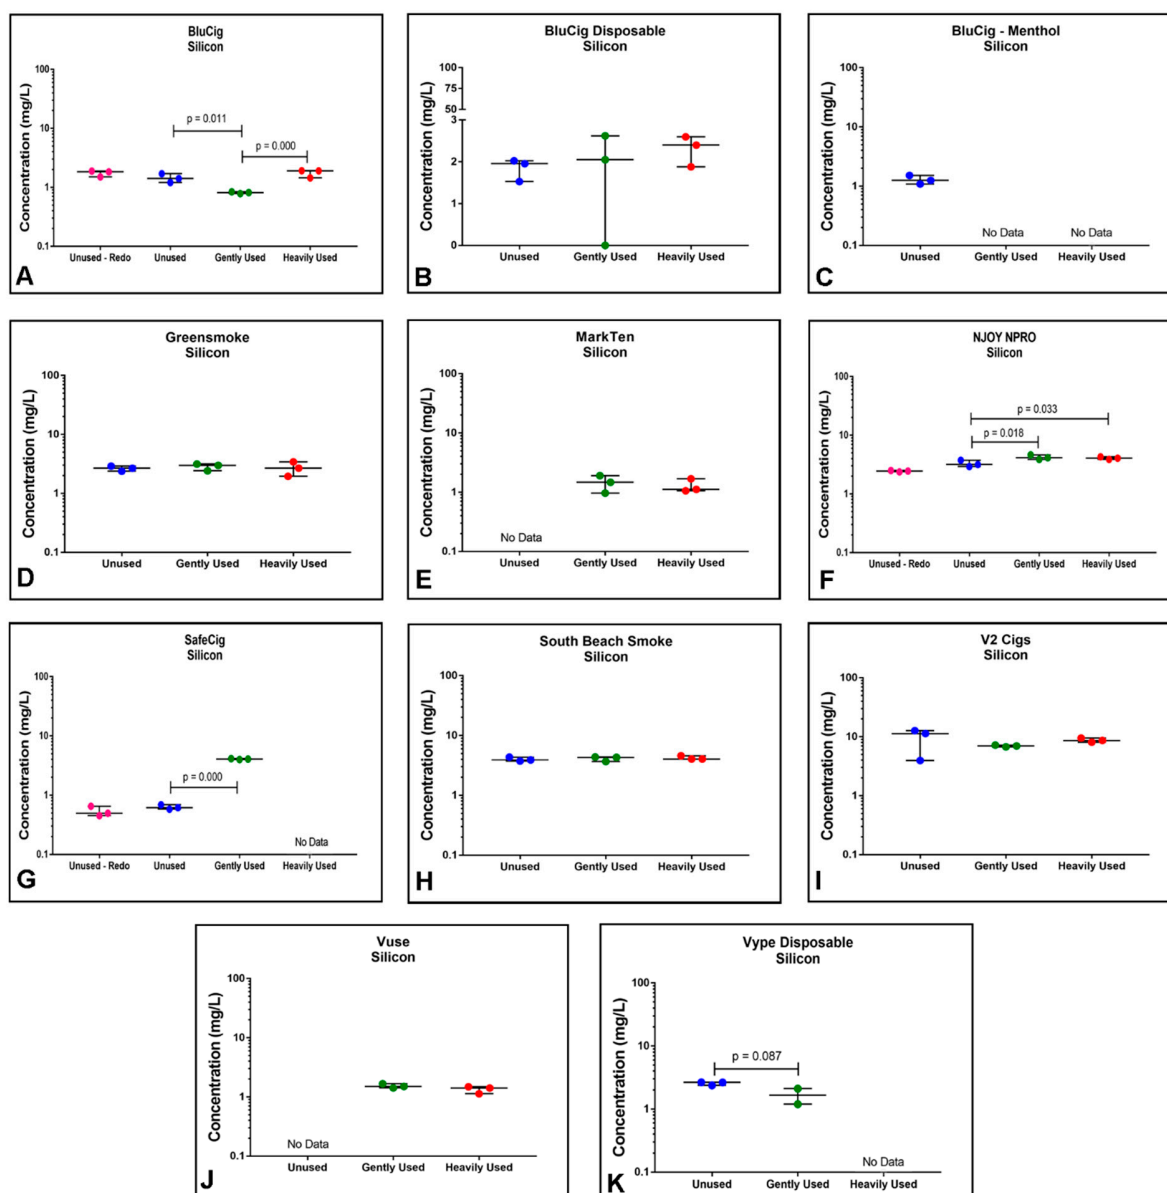

**Figure S11. Silicon concentrations in ten brands of unused, gently used, and heavily used first generation EC fluid.** (A) BluCig, (B) BluCig Disposable, (C) BluCig – Menthol, (D) Greensmoke, (E) MarkTen, (F) NJOY NPRO, (G) SafeCig, (H) South Beach Smoke, (I) V2 Cigs, (J) Vuse, and (K) Vype Disposable. All fluids were analyzed in triplicates. Blue = unused, green = gently used, red = heavily used, pink = retesting of unused fluid.



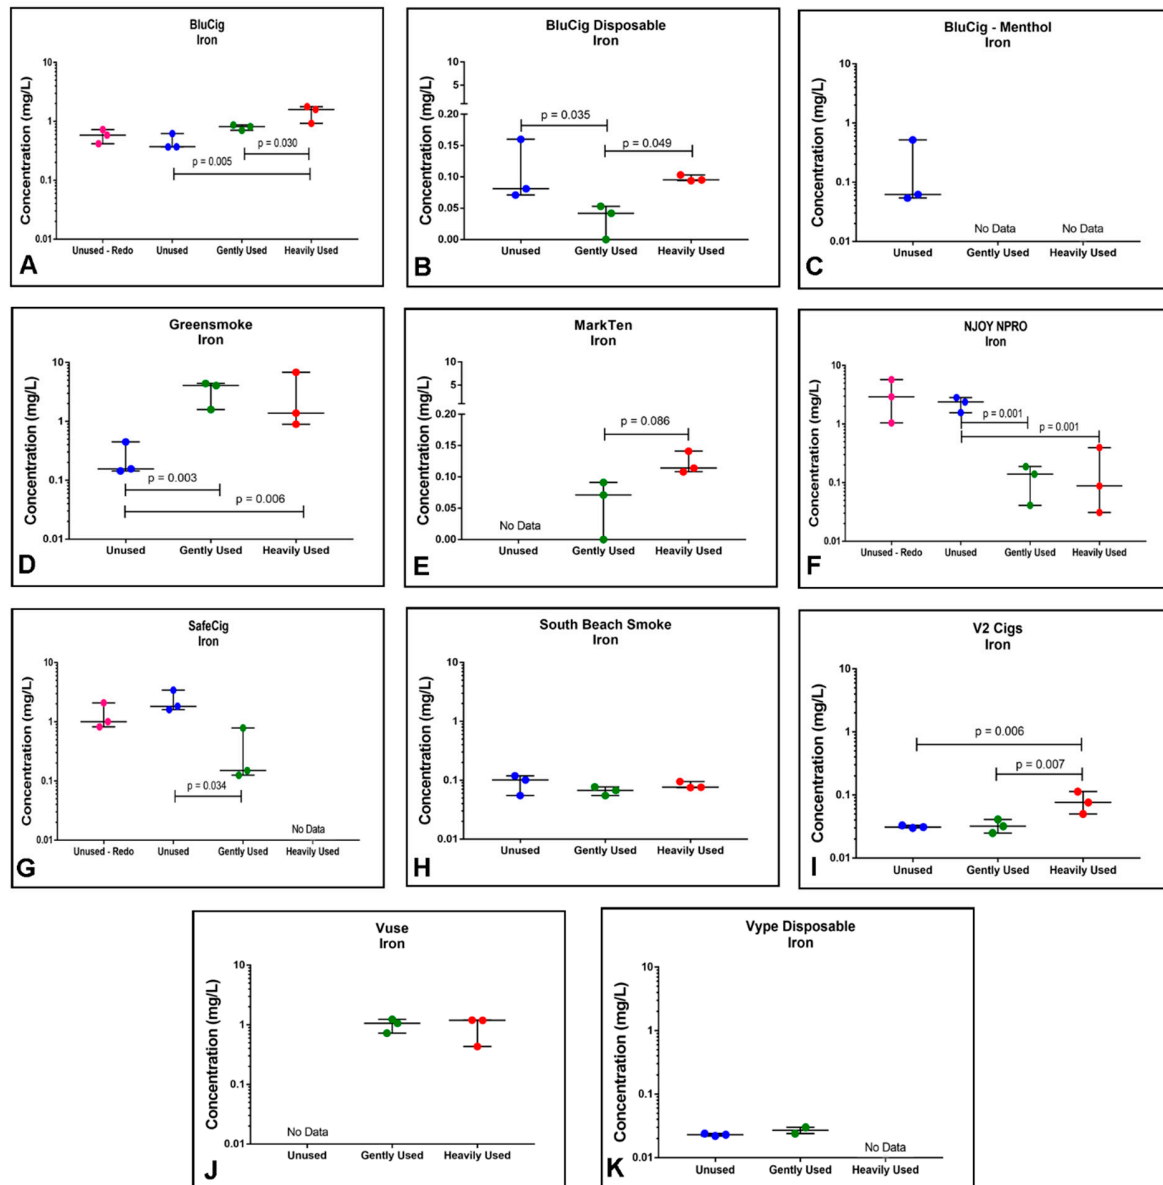

**Figure S12. Iron concentrations in ten brands of unused, gently used, and heavily used first generation EC fluid.** (A) BluCig, (B) BluCig Disposable, (C) BluCig – Menthol, (D) Greensmoke, (E) MarkTen, (F) NJOY NPRO, (G) SafeCig, (H) South Beach Smoke, (I) V2 Cigs, (J) Vuse, and (K) Vype Disposable. All fluids were analyzed in triplicates. Blue = unused, green = gently used, red = heavily used, pink = retesting of unused fluid.

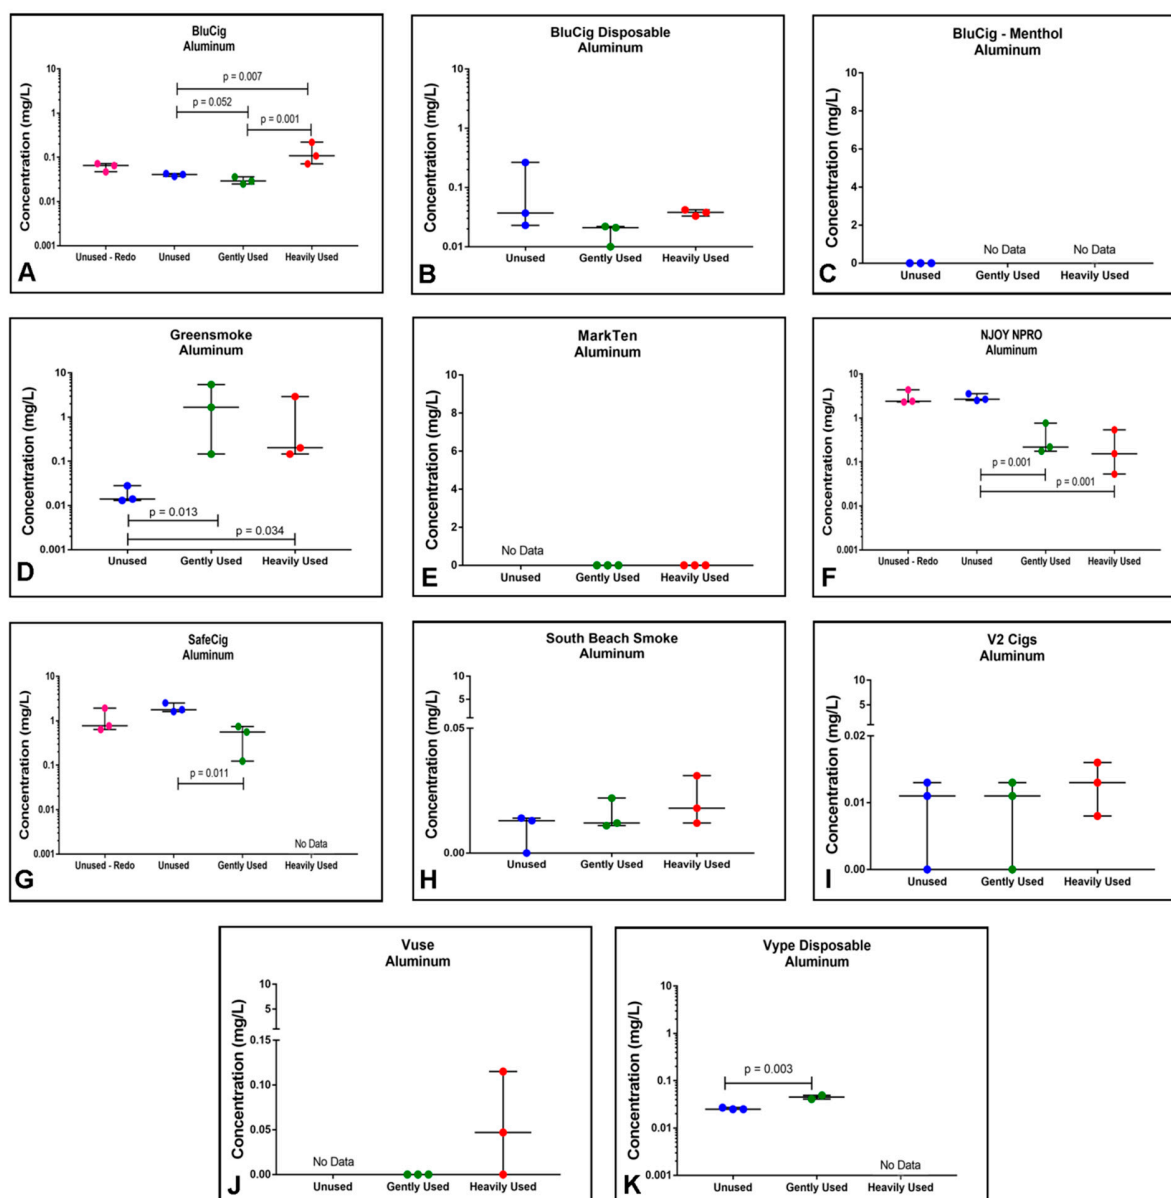

**Figure S13. Aluminum concentrations in ten brands of unused, gently used, and heavily used first generation EC fluid.** (A) BluCig, (B) BluCig Disposable, (C) BluCig – Menthol, (D) Greensmoke, (E) MarkTen, (F) NJOY NPRO, (G) SafeCig, (H) South Beach Smoke, (I) V2 Cigs, (J) Vuse, and (K) Vype Disposable. All fluids were analyzed in triplicates. Blue = unused, green = gently used, red = heavily used, pink = retesting of unused fluid.

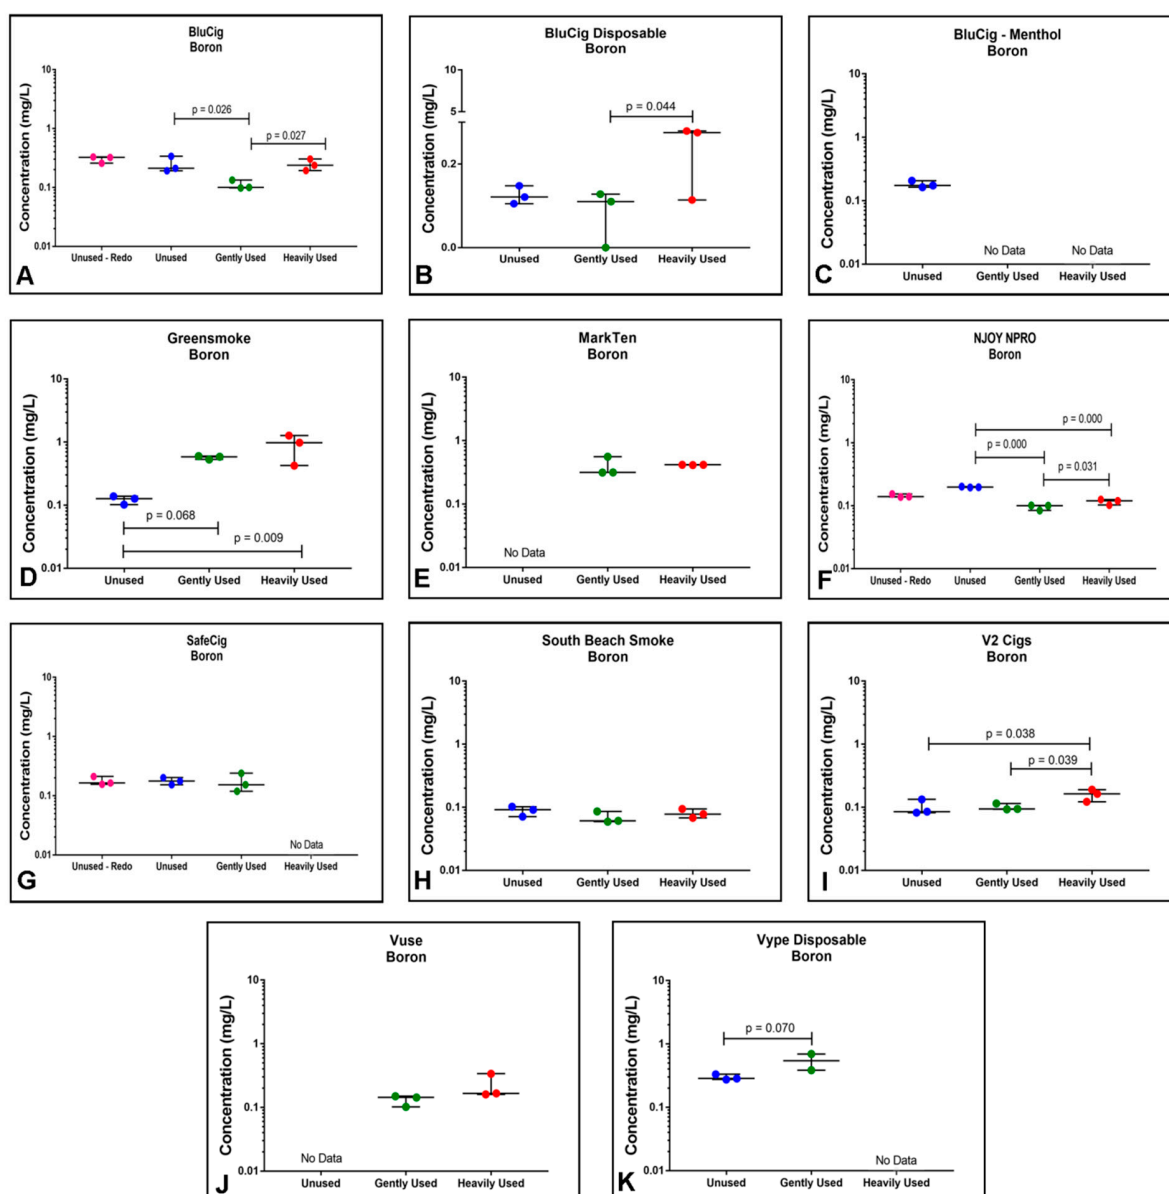

**Figure S14. Boron concentrations in ten brands of unused, gently used, and heavily used first generation EC fluid.** (A) BluCig, (B) BluCig Disposable, (C) BluCig – Menthol, (D) Greensmoke, (E) MarkTen, (F) NJOY NPRO, (G) SafeCig, (H) South Beach Smoke, (I) V2 Cigs, (J) Vuse, and (K) Vype Disposable. All fluids were analyzed in triplicates. Blue = unused, green = gently used, red = heavily used, pink = retesting of unused fluid.

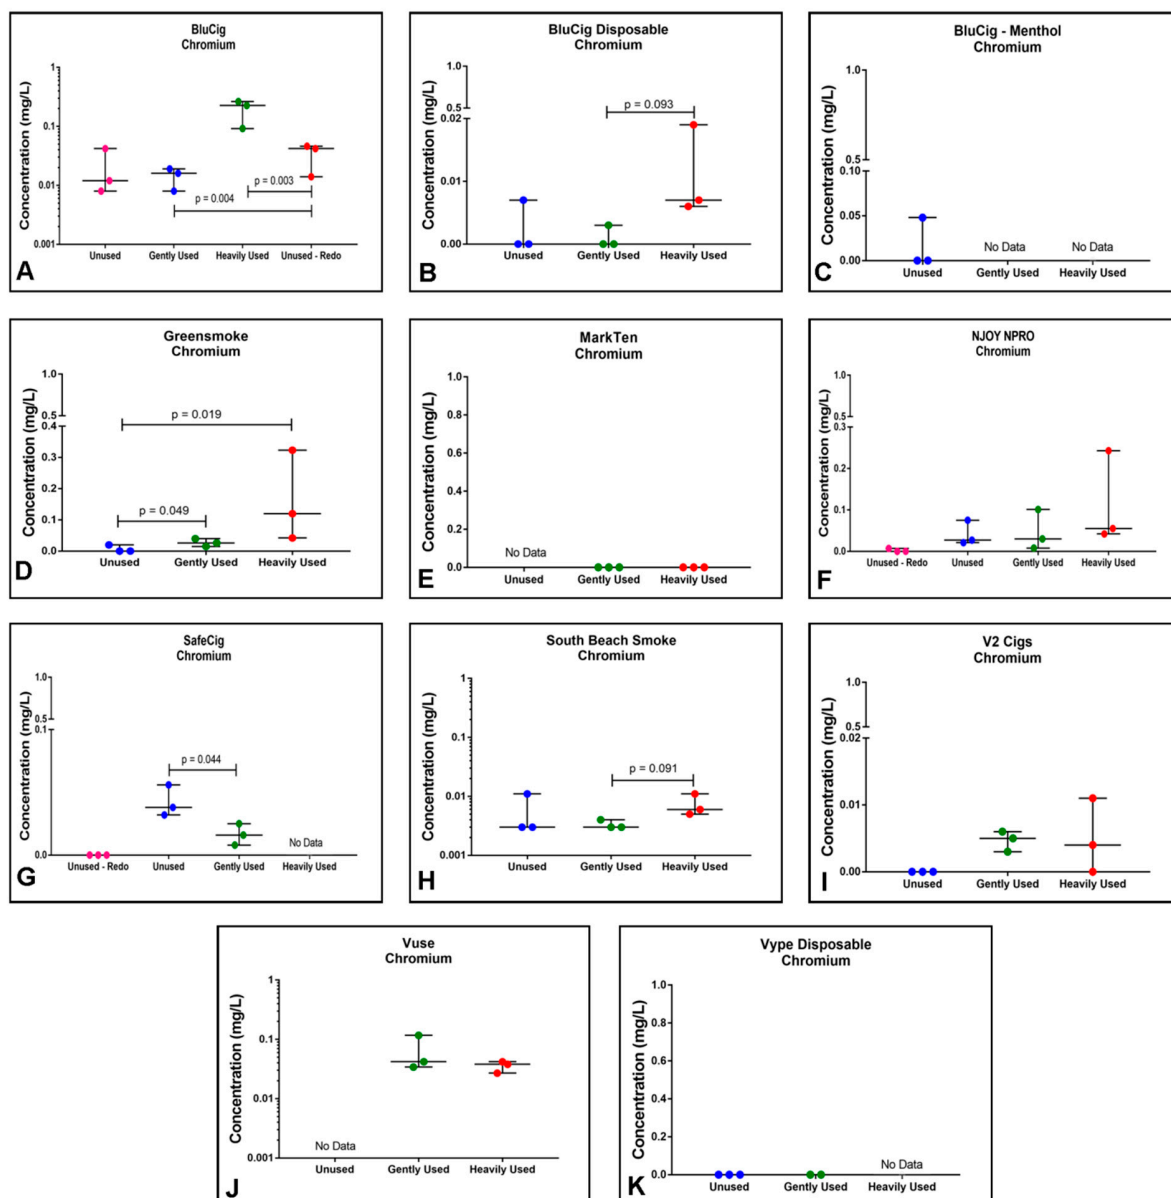

**Figure S15. Chromium concentrations in ten brands of unused, gently used, and heavily used first generation EC fluid.** (A) BluCig, (B) BluCig Disposable, (C) BluCig – Menthol, (D) Greensmoke, (E) MarkTen, (F) NJOY NPRO, (G) SafeCig, (H) South Beach Smoke, (I) V2 Cigs, (J) Vuse, and (K) Vype Disposable. All fluids were analyzed in triplicates. Blue = unused, green = gently used, red = heavily used, pink = retesting of unused fluid.

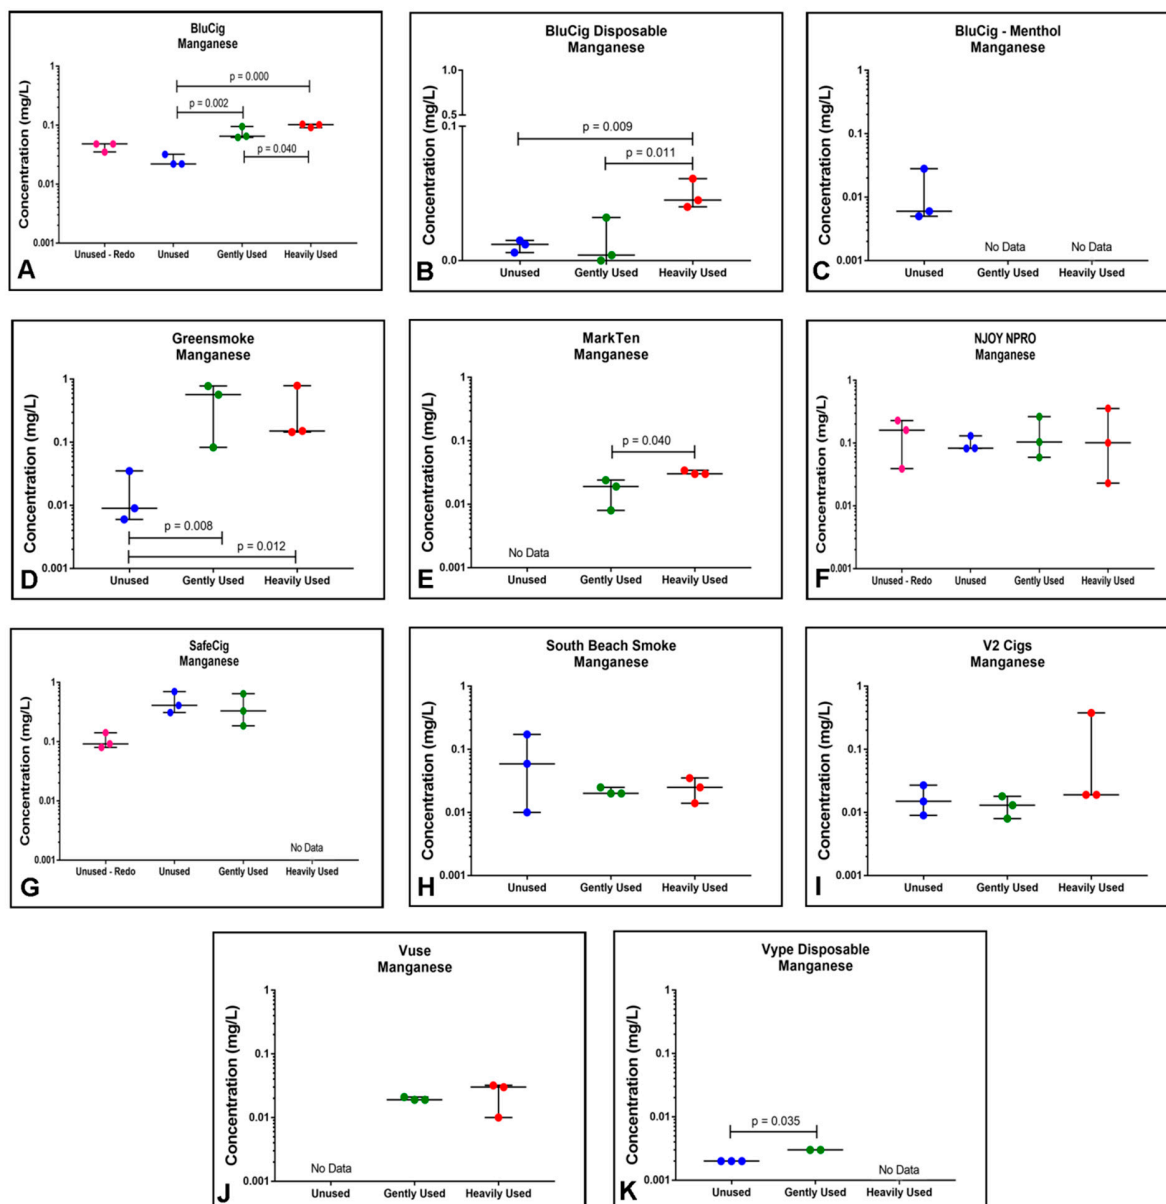

**Figure S16. Manganese concentrations in ten brands of unused, gently used, and heavily used first generation EC fluid.** (A) BluCig, (B) BluCig Disposable, (C) BluCig – Menthol, (D) Greensmoke, (E) MarkTen, (F) NJOY NPRO, (G) SafeCig, (H) South Beach Smoke, (I) V2 Cigs, (J) Vuse, and (K) Vype Disposable. All fluids were analyzed in triplicates. Blue = unused, green = gently used, red = heavily used, pink = retesting of unused fluid.

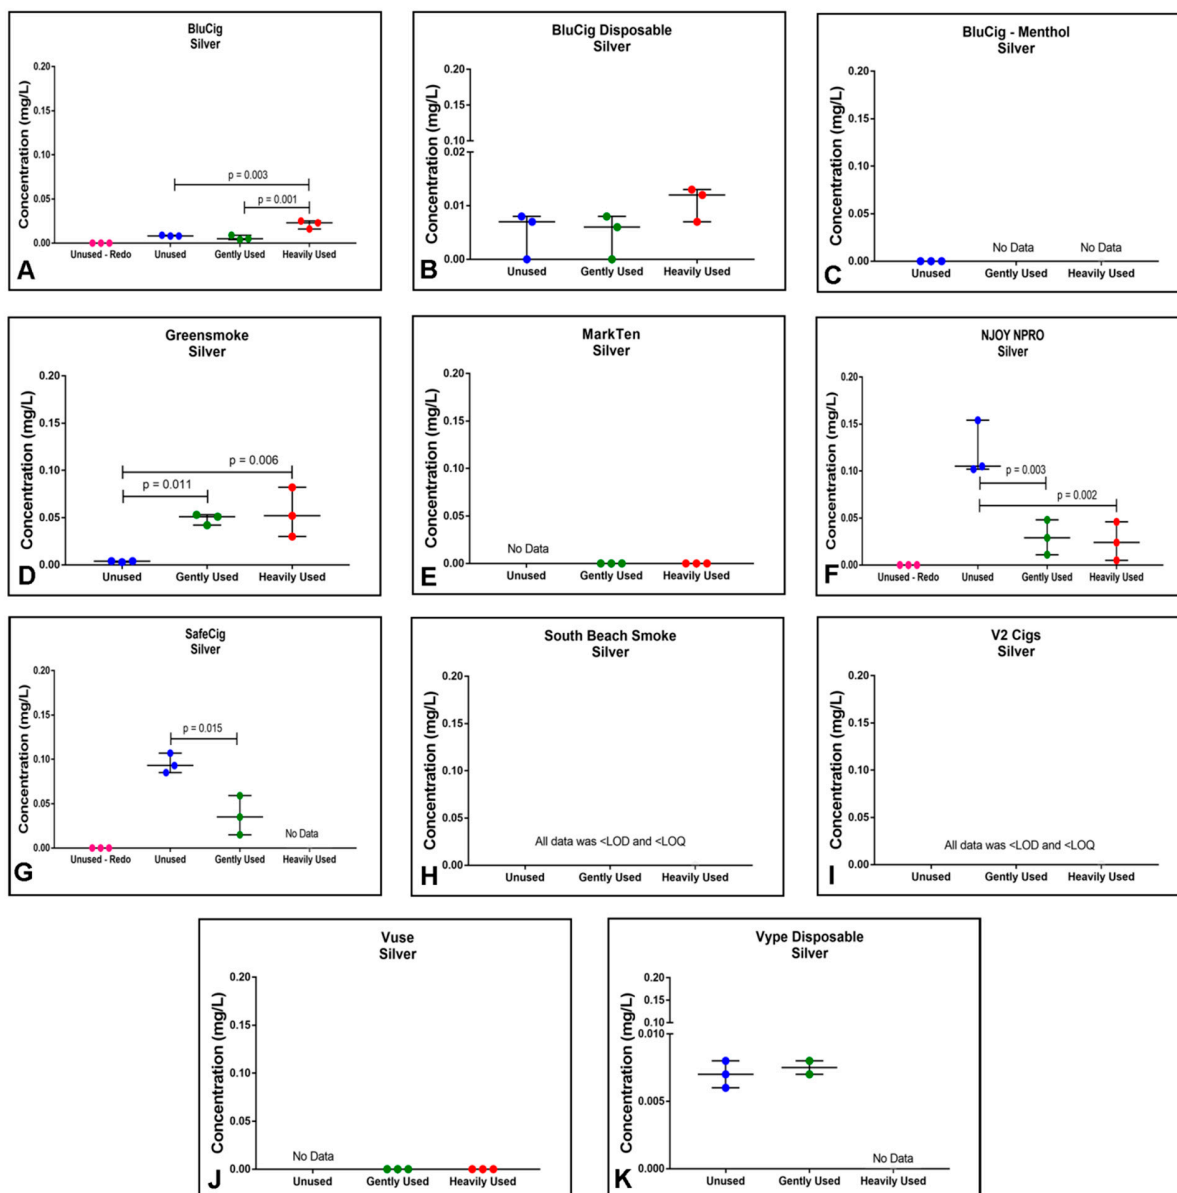

**Figure S17. Silver concentrations in ten brands of unused, gently used, and heavily used first generation EC fluid.** (A) BluCig, (B) BluCig Disposable, (C) BluCig – Menthol, (D) Greensmoke, (E) MarkTen, (F) NJOY NPRO, (G) SafeCig, (H) South Beach Smoke, (I) V2 Cigs, (J) Vuse, and (K) Vype Disposable. All fluids were analyzed in triplicates. Blue = unused, green = gently used, red = heavily used, pink = retesting of unused fluid.

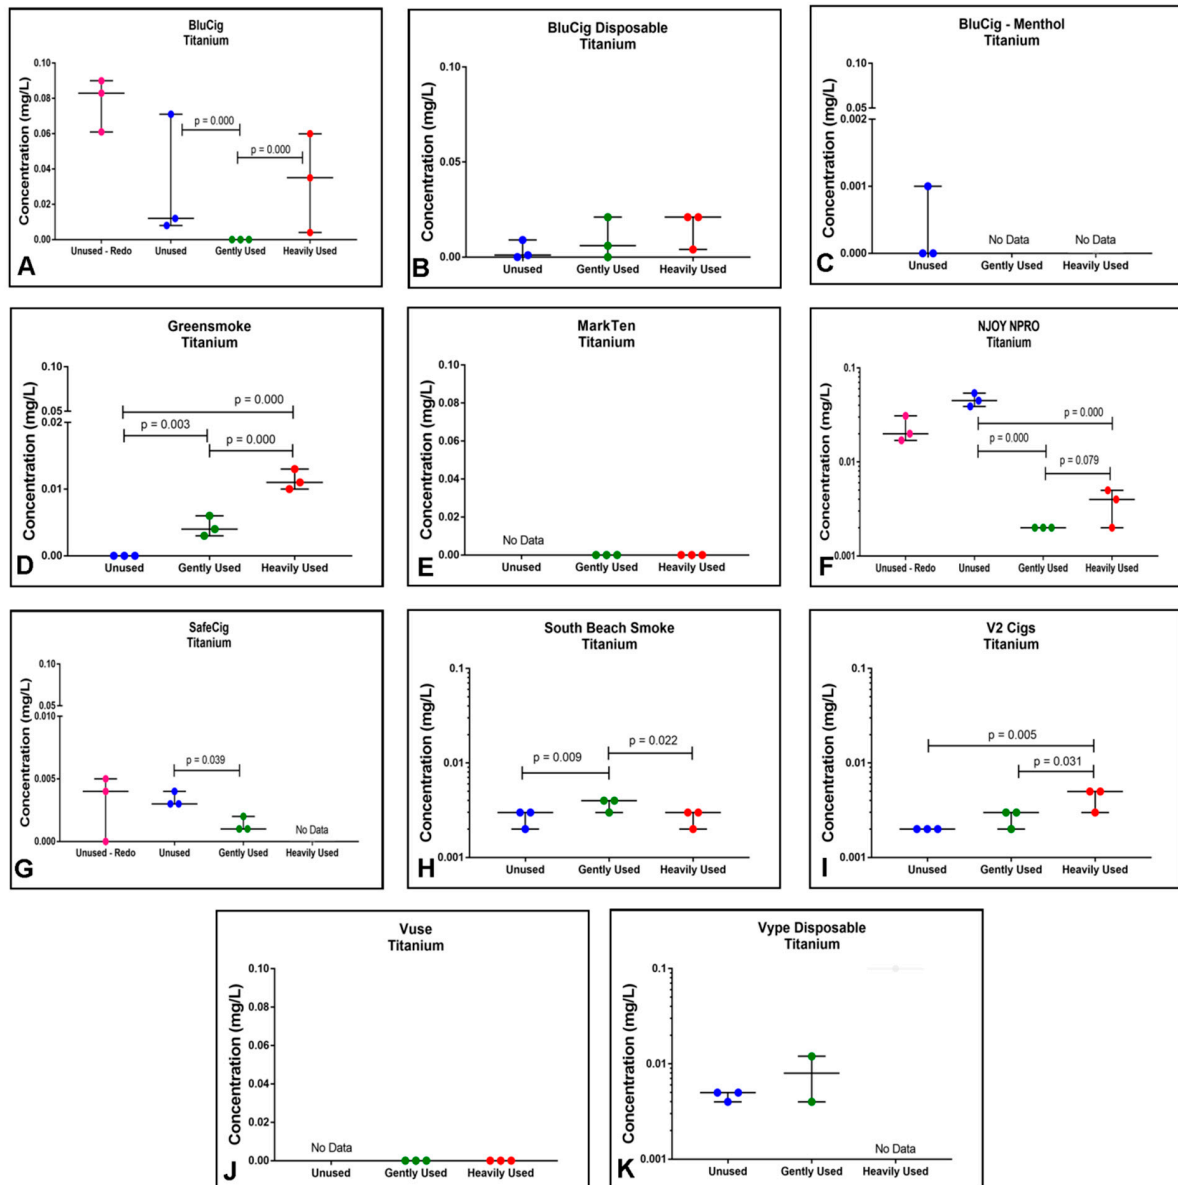

**Figure S18. Titanium concentrations in ten brands of unused, gently used, and heavily used first generation EC fluid.** (A) BluCig, (B) BluCig Disposable, (C) BluCig – Menthol, (D) Greensmoke, (E) MarkTen, (F) NJOY NPRO, (G) SafeCig, (H) South Beach Smoke, (I) V2 Cigs, (J) Vuse, and (K) Vype Disposable. All fluids were analyzed in triplicates. Blue = unused, green = gently used, red = heavily used, pink = retesting of unused fluid.

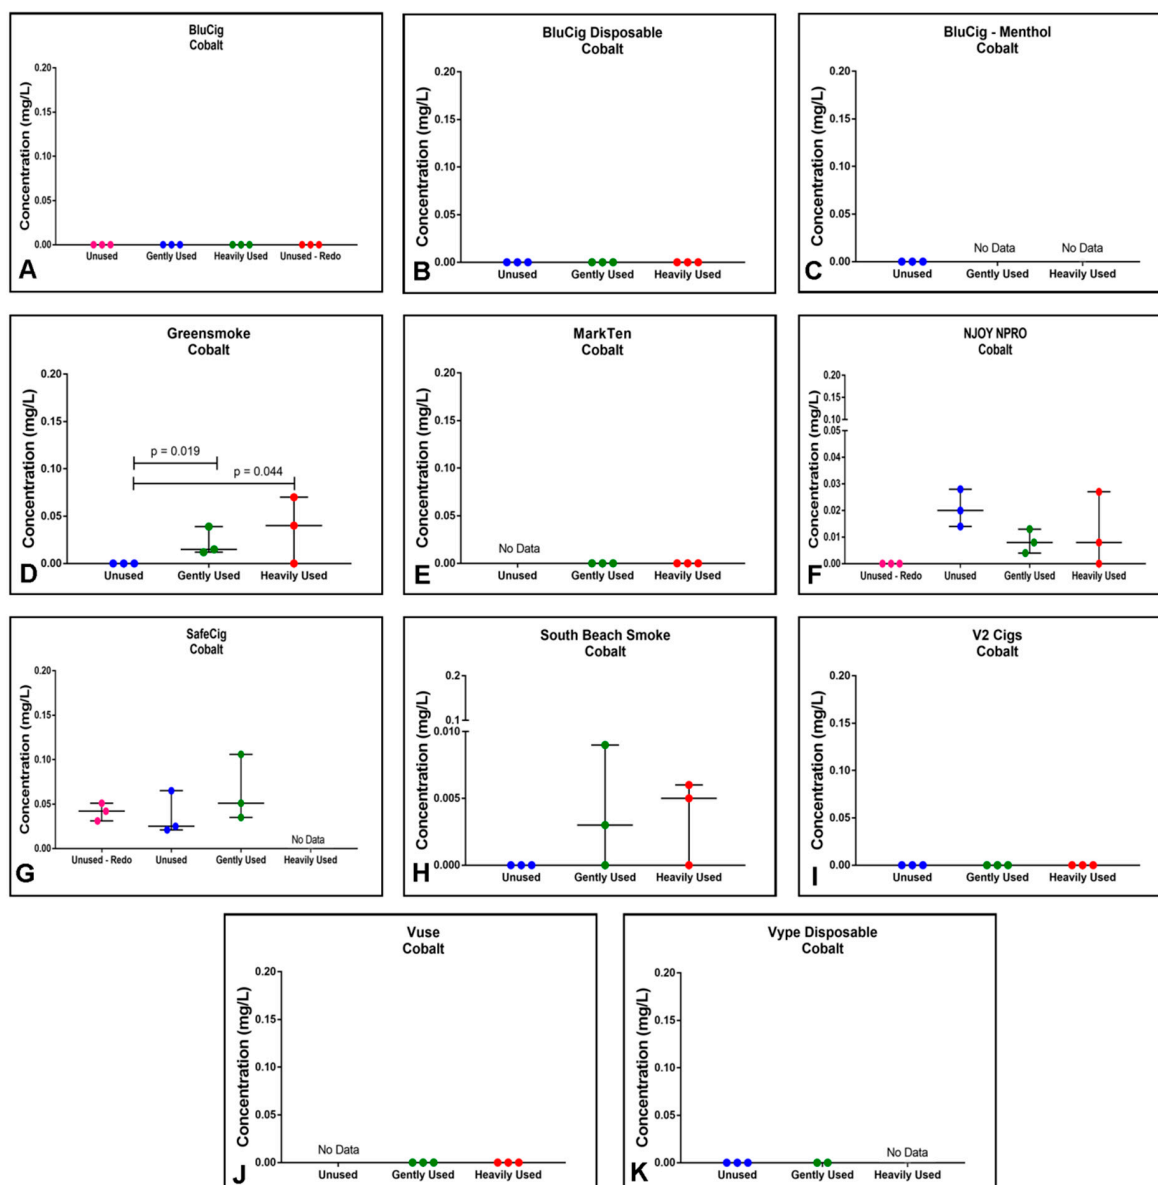

**Figure S19. Cobalt concentrations in ten brands of unused, gently used, and heavily used first generation EC fluid.** (A) BluCig, (B) BluCig Disposable, (C) BluCig – Menthol, (D) Greensmoke, (E) MarkTen, (F) NJOY NPRO, (G) SafeCig, (H) South Beach Smoke, (I) V2 Cigs, (J) Vuse, and (K) Vype Disposable. All fluids were analyzed in triplicates. Blue = unused, green = gently used, red = heavily used, pink = retesting of unused fluid.



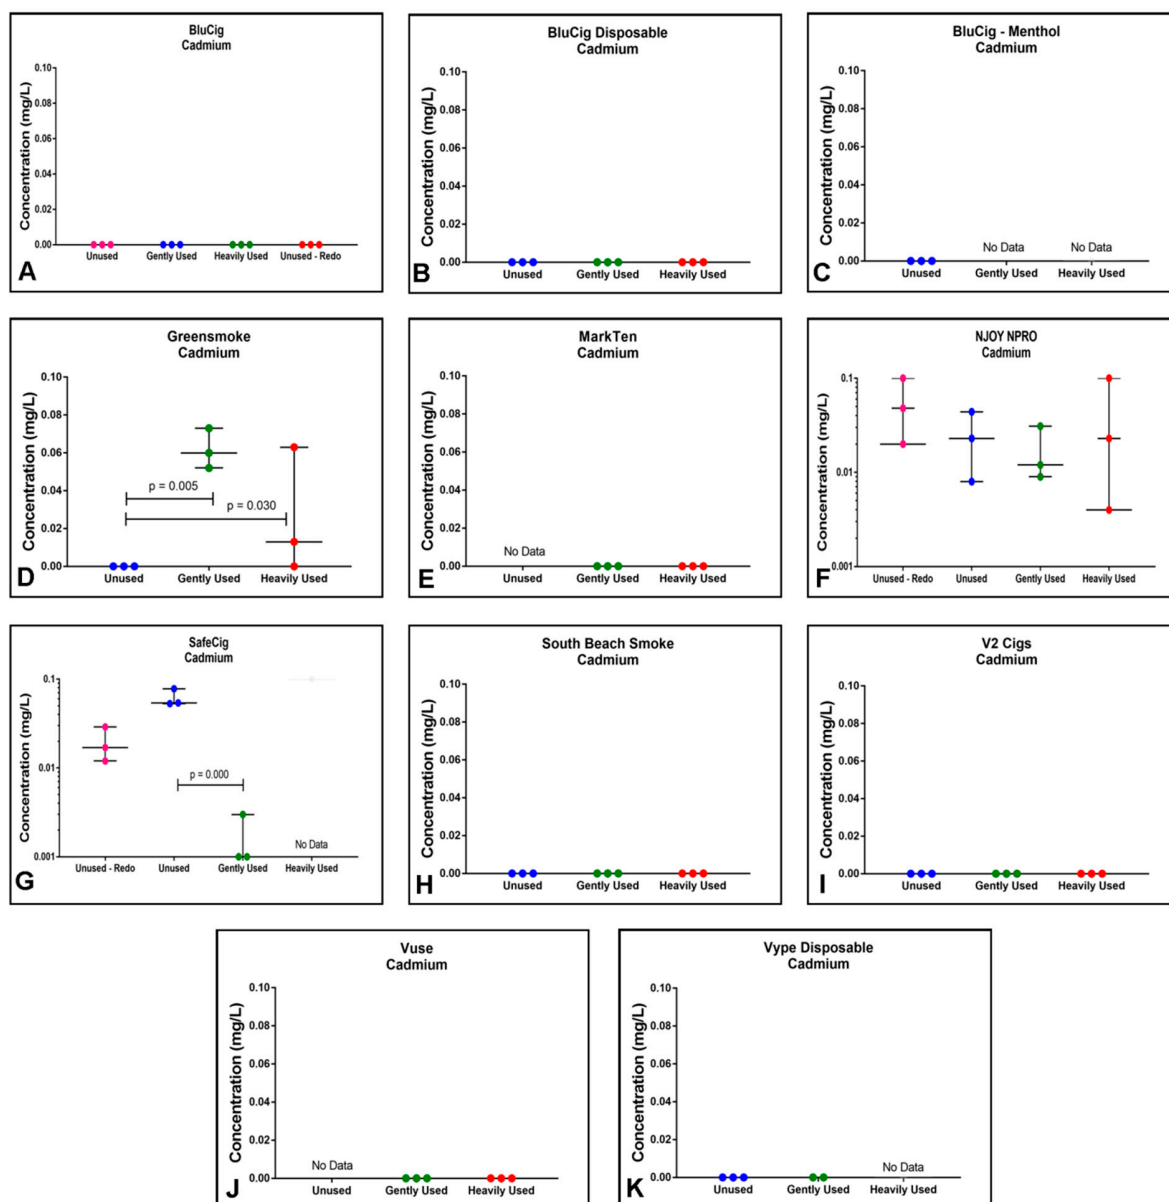

**Figure S20. Cadmium concentrations in ten brands of unused, gently used, and heavily used first generation EC fluid.** (A) BluCig, (B) BluCig Disposable, (C) BluCig – Menthol, (D) Greensmoke, (E) MarkTen, (F) NJOY NPRO, (G) SafeCig, (H) South Beach Smoke, (I) V2 Cigs, (J) Vuse, and (K) Vype Disposable. All fluids were analyzed in triplicates. Blue = unused, green = gently used, red = heavily used, pink = retesting of unused fluid.

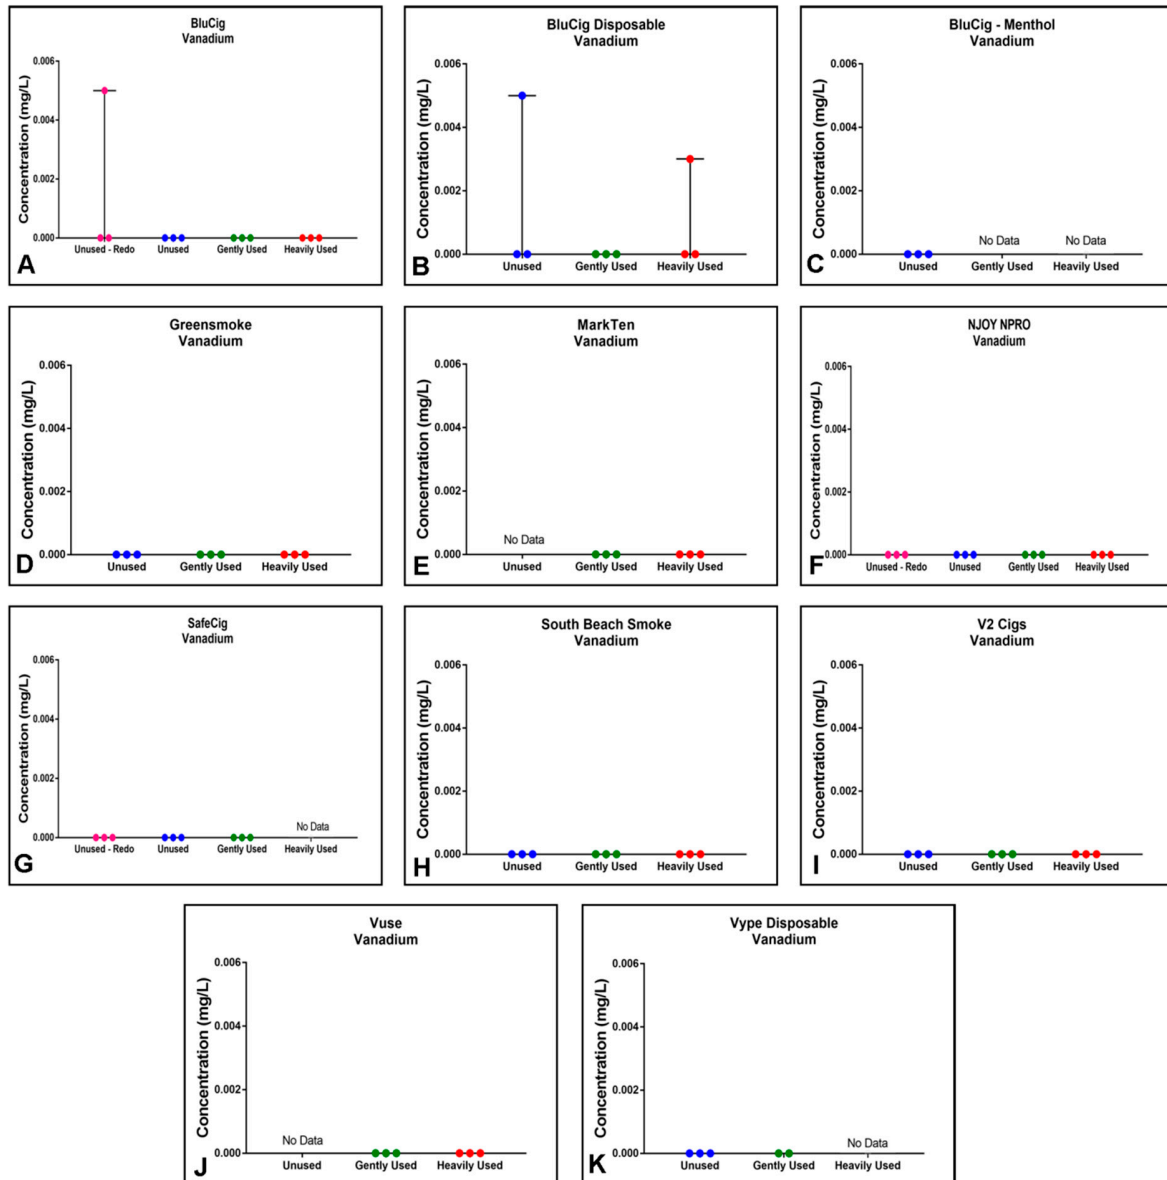

**Figure S21. Vanadium concentrations in ten brands of unused, gently used, and heavily used first generation EC fluid.** (A) BluCig, (B) BluCig Disposable, (C) BluCig – Menthol, (D) Greensmoke, (E) MarkTen, (F) NJOY NPRO, (G) SafeCig, (H) South Beach Smoke, (I) V2 Cigs, (J) Vuse, and (K) Vype Disposable. All fluids were analyzed in triplicates. Blue = unused, green = gently used, red = heavily used, pink = retesting of unused fluid.

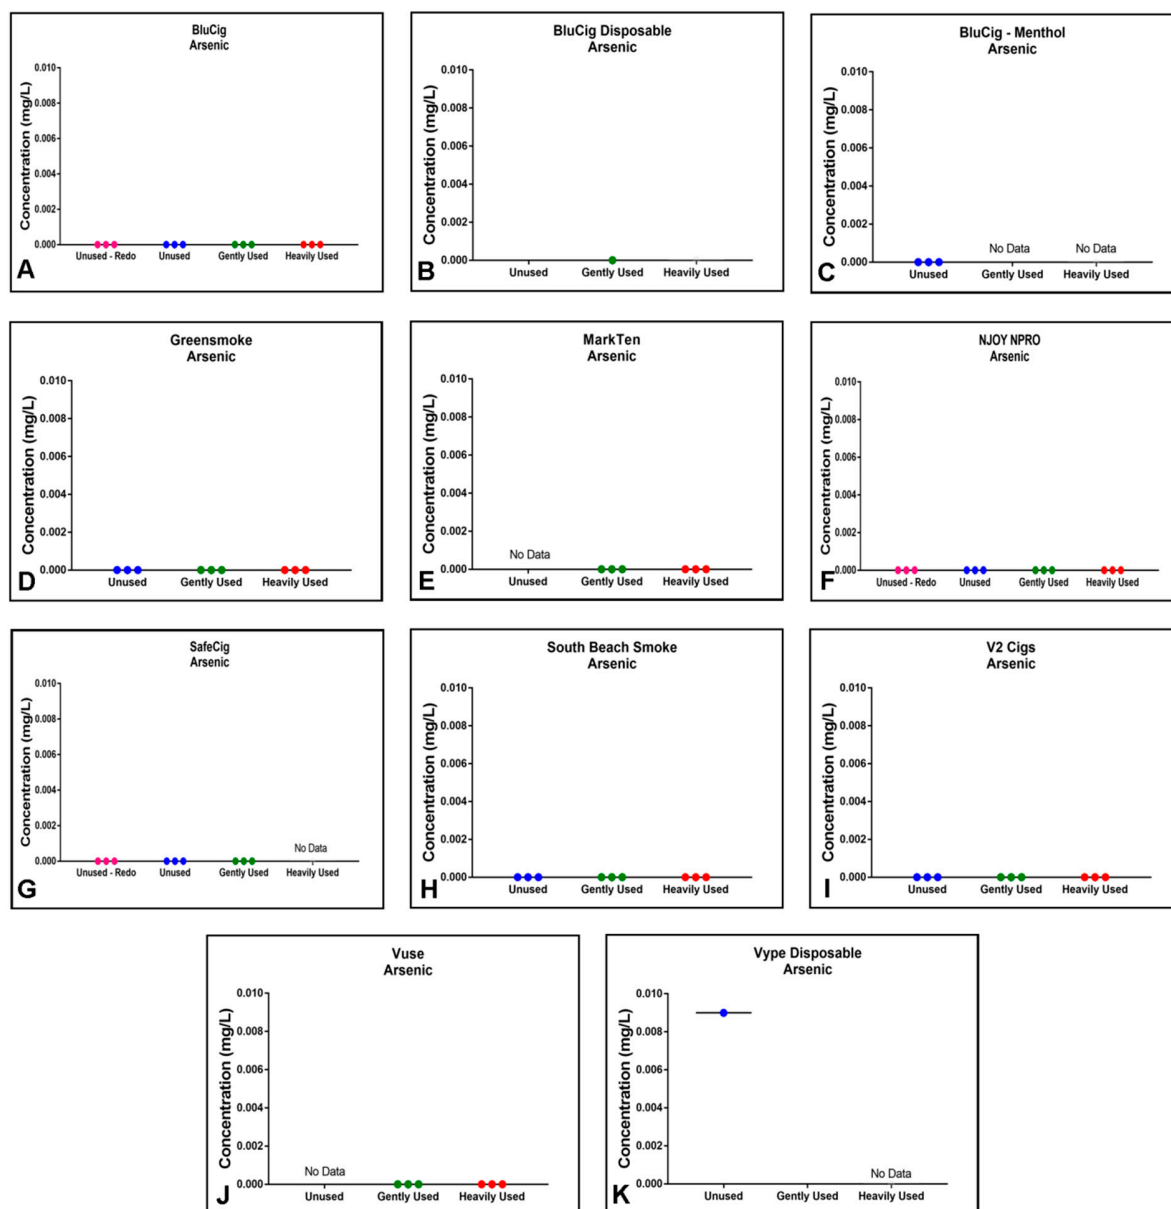

**Figure S22. Arsenic concentrations in ten brands of unused, gently used, and heavily used first generation EC fluid.** (A) BluCig, (B) BluCig Disposable, (C) BluCig – Menthol, (D) Greensmoke, (E) MarkTen, (F) NJOY NPRO, (G) SafeCig, (H) South Beach Smoke, (I) V2 Cigs, (J) Vuse, and (K) Vype Disposable. All fluids were analyzed in triplicates. Blue = unused, green = gently used, red = heavily used, pink = retesting of unused fluid.

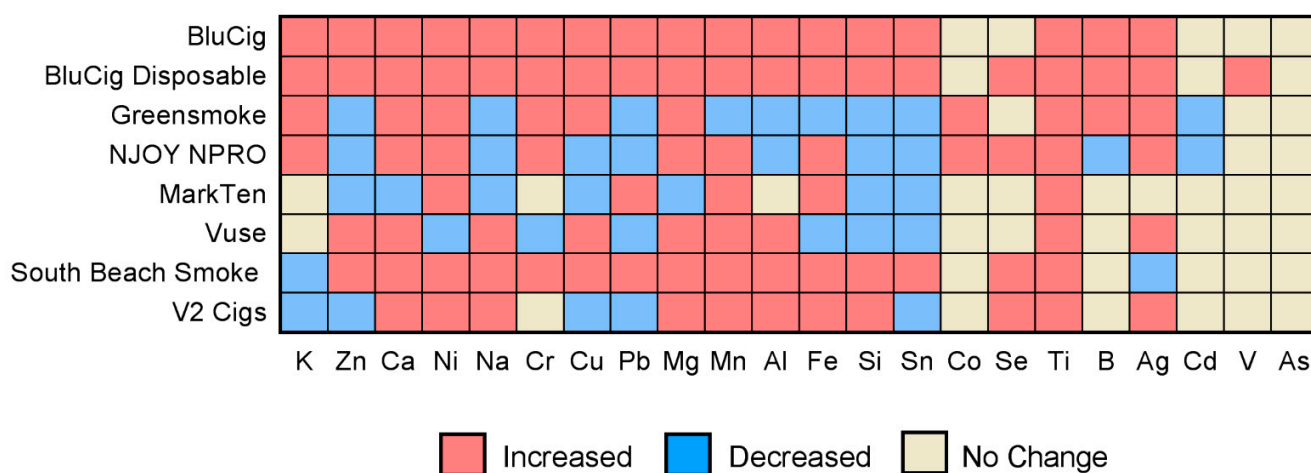

**Figure S23. Heat map showing element concentrations in heavily used EC fluids relative to gently used ECs fluids.** In 8 EC brands, a majority of the 22 element concentrations were higher in heavily used EC fluids when compared to gently used fluids. Red squares = increase, blue squares = decrease, tan squares = no change.

Table S8: Relationship between elements detected in unused (U), gently used (G), and heavily used (H) e-liquids and elements identified in EC atomizer components (Y).

| Element  | Brand             | Detected in Fluid | Identified in EC Components |            |                 |                     |          |      |        |
|----------|-------------------|-------------------|-----------------------------|------------|-----------------|---------------------|----------|------|--------|
|          |                   |                   | Filament                    | Thick Wire | Wire-Wire Joint | Wire-Air Tube Joint | Air Tube | Wick | Sheath |
| Aluminum | BluCig            | U, G, H           |                             |            |                 |                     |          | Y    | Y      |
|          | BluCig Disposable | U, G, H           |                             |            |                 |                     |          | Y    | Y      |
|          | Greensmoke        | U, G, H           |                             |            |                 |                     |          | Y    |        |
|          | Mark Ten          |                   |                             |            |                 |                     |          | Y    | Y      |
|          | NJOY NPRO         | U, G, H           |                             |            |                 |                     |          |      | Y      |
|          | SafeCig           | U, G              |                             |            |                 |                     |          |      | Y      |
|          | South Beach Smoke | U, G, H           |                             |            |                 |                     |          |      | Y      |
|          | V2 Cigs           | U, G, H           |                             |            |                 |                     |          | Y    | Y      |
|          | Vuse              | H                 |                             |            |                 |                     |          |      |        |
|          | Vype              | U, G              |                             |            |                 |                     |          |      | Y      |
|          |                   |                   |                             |            |                 |                     |          |      |        |
| Calcium  | BluCig            | U, G, H           |                             |            |                 |                     |          |      | Y      |
|          | BluCig Disposable | U, G, H           |                             |            |                 |                     |          | Y    | Y      |
|          | Greensmoke        | U, G, H           |                             |            |                 | Y                   |          | Y    | Y      |
|          | Mark Ten          | G, H              |                             |            |                 |                     |          |      | Y      |
|          | NJOY NPRO         | U, G, H           |                             |            |                 |                     |          |      | Y      |
|          | SafeCig           | U, G              |                             |            |                 |                     |          |      | Y      |
|          | South Beach Smoke | U, G, H           |                             |            |                 |                     |          |      | Y      |
|          | V2 Cigs           | U, G, H           |                             |            |                 |                     |          | Y    | Y      |
|          | Vuse              | G, H              |                             |            |                 |                     |          | Y    |        |
|          | Vype              | U, G              |                             |            |                 |                     |          |      | Y      |
|          |                   |                   |                             |            |                 |                     |          |      |        |
| Chromium | BluCig            | U, G, H           | Y                           |            | Y               |                     |          |      |        |
|          | BluCig Disposable | U, G, H           | Y                           |            |                 |                     |          |      |        |
|          | Greensmoke        | U, G, H           | Y                           |            |                 |                     |          |      |        |
|          | Mark Ten          |                   | Y                           |            |                 |                     |          |      |        |
|          | NJOY NPRO         | U, G, H           | Y                           |            |                 |                     |          |      |        |
|          | SafeCig           | G, H              | Y                           |            |                 |                     |          |      |        |
|          | South Beach Smoke | U, G, H           | Y                           |            |                 |                     |          |      |        |
|          | V2 Cigs           | G, H              | Y                           |            | Y               |                     |          |      |        |
|          | Vuse              | G, H              | Y                           |            |                 |                     |          |      |        |
|          | Vype              |                   | Y                           |            |                 |                     |          |      |        |

|        |                   |         |   |   |   |   |   |  |  |
|--------|-------------------|---------|---|---|---|---|---|--|--|
|        |                   |         |   |   |   |   |   |  |  |
| Cobalt | BluCig            |         |   |   |   |   |   |  |  |
|        | BluCig Disposable |         |   |   |   |   |   |  |  |
|        | Greensmoke        | G, H    |   |   |   |   |   |  |  |
|        | Mark Ten          |         |   |   |   |   |   |  |  |
|        | NJOY NPRO         | U, G, H |   |   |   |   |   |  |  |
|        | SafeCig           | U, G    |   |   |   |   |   |  |  |
|        | South Beach Smoke | G, H    |   |   |   |   | Y |  |  |
|        | V2 Cigs           |         |   |   |   |   |   |  |  |
|        | Vuse              |         |   |   |   |   |   |  |  |
|        | Vype              |         |   |   |   |   |   |  |  |
|        |                   |         |   |   |   |   |   |  |  |
| Copper | BluCig            | U, G, H | Y | Y | Y |   | Y |  |  |
|        | BluCig Disposable | U, G, H |   | Y |   |   |   |  |  |
|        | Greensmoke        | U, G, H |   | Y | Y |   | Y |  |  |
|        | Mark Ten          | G, H    |   | Y | Y | Y |   |  |  |
|        | NJOY NPRO         | U, G, H |   | Y | Y |   | Y |  |  |
|        | SafeCig           | U, G    | Y | Y | Y | Y |   |  |  |
|        | South Beach Smoke | U, G, H |   |   |   |   | Y |  |  |
|        | V2 Cigs           | U, G, H |   |   |   | Y | Y |  |  |
|        | Vuse              | G, H    | Y |   |   |   |   |  |  |
|        | Vype              | U, G    |   | Y | Y |   |   |  |  |
|        |                   |         |   |   |   |   |   |  |  |
| Iron   | BluCig            | U, G, H |   |   | Y |   | Y |  |  |
|        | BluCig Disposable | U, G, H |   |   |   |   |   |  |  |
|        | Greensmoke        | U, G, H |   |   |   |   |   |  |  |
|        | Mark Ten          | G, H    |   |   |   |   |   |  |  |
|        | NJOY NPRO         | U, G, H |   |   |   |   |   |  |  |
|        | SafeCig           | U, G    | Y |   |   |   |   |  |  |
|        | South Beach Smoke | U, G, H | Y |   |   |   | Y |  |  |
|        | V2 Cigs           | U, G, H | Y |   |   |   |   |  |  |
|        | Vuse              | G, H    | Y |   |   |   |   |  |  |
|        | Vype              | U, G    |   |   |   |   |   |  |  |
|        |                   |         |   |   |   |   |   |  |  |
| Lead   | BluCig            | U, G, H |   |   |   | Y | Y |  |  |
|        | BluCig Disposable | U, G, H |   |   |   |   |   |  |  |
|        | Greensmoke        | G, H    |   |   |   |   |   |  |  |

|           |                   |         |   |  |   |   |   |   |   |
|-----------|-------------------|---------|---|--|---|---|---|---|---|
|           | Mark Ten          | G, H    |   |  |   |   |   |   |   |
|           | NJOY NPRO         | U, G, H |   |  |   |   |   |   |   |
|           | SafeCig           | U, G    |   |  |   |   |   |   |   |
|           | South Beach Smoke | U, G, H |   |  |   |   | Y |   |   |
|           | V2 Cigs           | G, H    |   |  |   | Y |   |   |   |
|           | Vuse              | G, H    |   |  |   |   |   |   |   |
|           | Vype              | U, G    |   |  |   |   |   |   |   |
|           |                   |         |   |  |   |   |   |   |   |
| Magnesium | BluCig            | U, G, H |   |  |   |   |   | Y | Y |
|           | BluCig Disposable | U, G, H |   |  |   |   |   | Y | Y |
|           | Greensmoke        | U, G, H |   |  |   |   |   | Y | Y |
|           | Mark Ten          | G, H    |   |  |   |   |   |   | Y |
|           | NJOY NPRO         | U, G, H |   |  |   |   |   |   | Y |
|           | SafeCig           | U, G    |   |  |   |   |   |   |   |
|           | South Beach Smoke | U, G, H |   |  |   |   |   |   | Y |
|           | V2 Cigs           | U, G, H |   |  |   |   |   |   | Y |
|           | Vuse              | G, H    |   |  |   |   |   | Y |   |
|           | Vype              | U, G    |   |  |   |   |   |   | Y |
|           |                   |         |   |  |   |   |   |   |   |
| Manganese | BluCig            | U, G, H |   |  |   |   |   |   |   |
|           | BluCig Disposable | U, G, H |   |  |   |   |   |   |   |
|           | Greensmoke        | U, G, H |   |  |   |   |   |   |   |
|           | Mark Ten          | G, H    |   |  |   |   |   |   |   |
|           | NJOY NPRO         | U, G, H |   |  |   |   |   |   |   |
|           | SafeCig           | U, G    |   |  |   |   |   |   |   |
|           | South Beach Smoke | U, G, H | Y |  |   |   |   |   |   |
|           | V2 Cigs           | U, G, H |   |  |   |   |   |   |   |
|           | Vuse              | G, H    |   |  |   |   |   |   |   |
|           | Vype              | U, G    |   |  |   |   |   |   |   |
|           |                   |         |   |  |   |   |   |   |   |
| Nickel    | BluCig            | U, G, H | Y |  | Y |   | Y |   |   |
|           | BluCig Disposable | U, G, H | Y |  |   |   |   |   |   |
|           | Greensmoke        | U, G, H | Y |  |   |   | Y |   |   |
|           | Mark Ten          | G, H    | Y |  |   |   | Y |   |   |
|           | NJOY NPRO         | U, G, H | Y |  |   |   | Y |   |   |
|           | SafeCig           | U, G    | Y |  |   |   | Y |   |   |
|           | South Beach Smoke | U, G, H | Y |  |   |   | Y |   |   |

[illegible]



|        |                   |         |  |   |   |   |   |   |   |
|--------|-------------------|---------|--|---|---|---|---|---|---|
| Sodium | BluCig            | U, G, H |  |   |   |   |   |   | Y |
|        | BluCig Disposable | U, G, H |  |   |   |   |   |   |   |
|        | Greensmoke        | U, G, H |  |   |   |   |   |   |   |
|        | Mark Ten          | G, H    |  |   |   |   |   |   |   |
|        | NJOY NPRO         | U, G, H |  |   |   |   |   |   | Y |
|        | SafeCig           | U, G    |  |   |   |   |   |   |   |
|        | South Beach Smoke | U, G, H |  |   |   |   |   |   |   |
|        | V2 Cigs           | U, G, H |  |   |   |   |   |   |   |
|        | Vuse              | H       |  |   |   |   |   | Y |   |
|        | Vype              | U, G    |  |   |   |   |   |   |   |
|        |                   |         |  |   |   |   |   |   |   |
| Tin    | BluCig            | U, G, H |  |   |   | Y |   |   |   |
|        | BluCig Disposable | U, G, H |  |   |   | Y |   |   |   |
|        | Greensmoke        | U, G, H |  |   |   | Y |   |   |   |
|        | Mark Ten          | G, H    |  |   |   | Y |   |   |   |
|        | NJOY NPRO         | U, G, H |  | Y |   |   |   |   |   |
|        | SafeCig           | U, G    |  |   |   | Y |   |   |   |
|        | South Beach Smoke | U, G, H |  |   |   |   | Y |   |   |
|        | V2 Cigs           | U, G, H |  |   |   |   |   |   |   |
|        | Vuse              | G, H    |  |   |   |   |   |   |   |
|        | Vype              | U, G    |  |   |   | Y |   |   |   |
|        |                   |         |  |   |   |   |   |   |   |
| Zinc   | BluCig            | U, G, H |  |   |   |   | Y |   |   |
|        | BluCig Disposable | U, G, H |  |   | Y |   |   |   |   |
|        | Greensmoke        | U, G, H |  |   | Y |   | Y |   |   |
|        | Mark Ten          | G, H    |  |   | Y |   |   |   |   |
|        | NJOY NPRO         | U, G, H |  |   |   |   | Y |   |   |
|        | SafeCig           | U, G    |  |   | Y | Y | Y |   |   |
|        | South Beach Smoke | U, G, H |  |   |   |   | Y |   |   |
|        | V2 Cigs           | U, G, H |  |   |   | Y | Y |   |   |
|        | Vuse              | G, H    |  |   |   |   |   |   |   |
|        | Vype              | U, G    |  |   | Y |   |   |   |   |

Table S9. Flavor chemicals and acids in aged unused and used e-liquids that were below limit of quantification or not detected

| Flavor Chemicals Detected <LOQ |                       | Acids – Not Detected |
|--------------------------------|-----------------------|----------------------|
| Furfural                       | Hemineurine           | Benzoic acid         |
| Furfuryl alcohol               | Eugenol               | Salicylic acid       |
| 2,5-dimethylpyrazine           | Piperonal             | Propionic acid       |
| 2,3,5-Trimethylpyrazine        | $\alpha$ -Damascone   | Maleic acid          |
| Limonene                       | $\beta$ -Damascone    |                      |
| Acetylpyrazine                 | Hydrocoumarin         |                      |
| Benzyl Alcohol                 | Ethyl Vanillin        |                      |
| 2,3,5,6-Tetramethylpyrazine    | $\delta$ -Decalactone |                      |
| Phenethyl alcohol              | Raspberry ketone      |                      |
| Menthol                        | Gingerone             |                      |
| $\alpha$ -Terpineol            |                       |                      |

Table S10. Concentrations of elements/metals reported in the e-liquids (µg/mg)

| Means     | Flora et al<br>2016 | Hess et al<br>2017 | Dunbar et al<br>2018 | Zhao et al<br>2018 | Olmedo et al<br>2018 | Williams et al 2020 |              | Current Study  |
|-----------|---------------------|--------------------|----------------------|--------------------|----------------------|---------------------|--------------|----------------|
| EC type   | Cartridge           | Cartridge          | Cartridge            | Bottle/Cartridge   | Tank                 | Cartomizer          | Tank         | Cartridge      |
| Aluminum  |                     |                    |                      |                    | 101                  | 15.5                | 6.03-575     | 6.9-2091       |
| Arsenic   | <430                |                    |                      |                    | 4.2                  | 15.5-56.0           | 36.2-79.3    |                |
| Cadmium   | <220                | 0.4-176            |                      |                    | 0.4                  |                     |              | 1.72-53.4      |
| Cobalt    |                     |                    |                      |                    | 10.8                 |                     |              | 3.45-55.2      |
| Chromium  |                     | 46.4 - 1815        |                      |                    | 214                  | 0.86                | 0.86-1673.3  | 0.86-167.2     |
| Copper    |                     |                    |                      |                    | 1990                 | 115.5-3278.4        | 44.0-1050.9  | 134.5-366043.1 |
| Iron      |                     |                    |                      |                    | 1880                 | 17.2-282.8          | 0.86-78726.7 | 23.3-2892.2    |
| Manganese |                     | 24.7-5943          |                      |                    | 124                  |                     |              | 2.59-411.2     |
| Nickel    |                     | 50.5-19436         |                      |                    | 2510                 | 10.3                | 56.0-4325    | 0.86-61287.1   |
| Lead      |                     | 4.2-1694           | <7.8                 |                    | 517                  |                     |              | 12.1-40312.9   |
| Zinc      |                     |                    |                      | 220                | 3250                 | 121.6-2058.6        | 360.3-1644.8 | 440.5-254991.4 |

Color code: grey = higher in current study.

Table S11. Comparison of element/metal concentrations (mg/L) in cigarette butts (CB) and EC cartomizers

|             | Moerman, Potts 2011 | Williams et al 2022 | Moerman, Potts 2011 | Williams et al 2022 |
|-------------|---------------------|---------------------|---------------------|---------------------|
| CB = Day 34 | Non-smoked CB       | Unused              | Smoked CB           | Aged Used           |
| Aluminum    | 6.9                 | 4.831               | 8.92                | 5.46                |
| Cadmium     | 0.132               | 0.078               | 0.142               | 0.073               |
| Chromium    | 0.283               | 0.075               | 0.236               | 0.323               |
| Copper      | 0.67                | 1749                | 1.22                | 608.2               |
| Iron        | 75.3                | 57.28               | 45.3                | 6.82                |
| Lead        | 1.79                | 93.38               | 1.42                | 72.9                |
| Manganese   | 59.6                | 0.701               | 40.1                | 0.79                |
| Nickel      | 0.404               | 78.29               | 0.298               | 102.49              |
| Titanium    | 0.729               | 0.09                | 0.755               | 0.06                |
| Zinc        | 9.68                | 528.67              | 5.87                | 435.48              |

Color code: red = higher overall in CBs, grey = similar in both, blue = higher overall in ECs, orange = higher in CB, green = higher in EC.
